# Supplementary material for: Caspase-2 protects against ferroptotic cell death
Source: PubMed Central journal article supplement (PMC10907636; doi:10.1038/s41419-024-06560-6), 2024-03-01
Supplement: 41419_2024_6560_MOESM7_ESM.pdf [file 41419_2024_6560_MOESM7_ESM.pdf]

## Supplementary table 1

### List of all proteins identified by Bio-ID

| UniProt | Genes  | Protein Name                                                                                                                                                                                                                                                                                             | BirA vs BirA_C320G_logFC | BirA vs BirA_C320G_adj.P.Val | Significant BirA vs BirA_C320G | BirA_Erastin vs BirA_C320G_Erastin_logFC | BirA_Erastin vs BirA_C320G_Erastin_adj.P.Val | Significant BirA_Erastin vs BirA_C320G_Erastin |
|---------|--------|----------------------------------------------------------------------------------------------------------------------------------------------------------------------------------------------------------------------------------------------------------------------------------------------------------|--------------------------|------------------------------|--------------------------------|------------------------------------------|----------------------------------------------|------------------------------------------------|
| P17066  | HSPA6  | Heat shock 70 kDa protein 6 (Heat shock 70 kDa protein B)                                                                                                                                                                                                                                                | -3.37                    | 8.01E-06                     | Down                           | -1.45                                    | 4.35E-02                                     | Down                                           |
| P42575  | CASP2  | Caspase-2 (CASP-2) (EC 3.4.22.55) (Neural precursor cell expressed developmentally down-regulated protein 2) (NEDD-2) (Protease ICH-1) [Cleaved into: Caspase-2 subunit p18; Caspase-2 subunit p13; Caspase-2 subunit p12]                                                                               | -6.07                    | 2.09E-08                     | Down                           | -5.92                                    | 2.70E-08                                     | Down                                           |
| Q96JH7  | VCPIP1 | Deubiquitinating protein VCPIP1 (EC 3.4.19.12) (Valosin-containing protein p97/p47 complex-interacting protein 1) (Valosin-containing protein p97/p47 complex-interacting protein p135) (VCP/p47 complex-interacting 135-kDa protein)                                                                    | -2.51                    | 3.73E-10                     | Down                           | -2.63                                    | 2.56E-10                                     | Down                                           |
| Q9BR76  | CORO1B | Coronin-1B (Coronin-2)                                                                                                                                                                                                                                                                                   | -1.52                    | 1.03E-05                     | Down                           | -1.14                                    | 5.05E-04                                     | Down                                           |
| P50990  | CCT8   | T-complex protein 1 subunit theta (TCP-1-theta) (CCT-theta) (Chaperonin containing T-complex polypeptide 1 subunit 8) (Renal carcinoma antigen NY-REN-15)                                                                                                                                                | -2.25                    | 1.06E-11                     | Down                           | -2.13                                    | 5.51E-11                                     | Down                                           |
| Q02543  | RPL18A | 60S ribosomal protein L18a (Large ribosomal subunit protein eL20)                                                                                                                                                                                                                                        | -1.56                    | 2.00E-05                     | Down                           | -2.34                                    | 5.95E-08                                     | Down                                           |
| Q9Y265  | RUVBL1 | RuvB-like 1 (EC 3.6.4.12) (49 kDa TATA box-binding protein-interacting protein) (49 kDa TBP-interacting protein) (54 kDa erythrocyte cytosolic protein) (ECP-54) (INO80 complex subunit H) (Nuclear matrix protein 238) (NMP 238) (Pontin 52) (TIP49a) (TIP60-associated protein 54-alpha) (TAP54-alpha) | -3.05                    | 6.53E-09                     | Down                           | -2.84                                    | 1.82E-08                                     | Down                                           |
| P46108  | CRK    | Adapter molecule crk (Proto-oncogene c-Crk) (p38)                                                                                                                                                                                                                                                        | -2.86                    | 1.02E-07                     | Down                           | -2.64                                    | 2.88E-07                                     | Down                                           |
| Q6Y7W6  | GIGYF2 | GRB10-interacting GYF protein 2 (PERQ amino acid-rich with GYF domain-containing protein 2) (Trinucleotide repeat-containing gene 15 protein)                                                                                                                                                            | -1.41                    | 4.82E-03                     | Down                           | -1.18                                    | 3.04E-02                                     | Down                                           |
| P11142  | HSPA8  | Heat shock cognate 71 kDa protein (EC 3.6.4.10) (Heat shock 70 kDa protein 8) (Lipopolysaccharide-associated protein 1) (LAP-1) (LPS-associated protein 1)                                                                                                                                               | -2.50                    | 1.06E-11                     | Down                           | -2.03                                    | 2.85E-10                                     | Down                                           |
| P25685  | DNAJB1 | DnaJ homolog subfamily B member 1 (DnaJ protein homolog 1) (Heat shock 40 kDa protein 1) (HSP40) (Heat shock protein 40) (Human DnaJ protein 1) (hDj-1)                                                                                                                                                  | -1.15                    | 1.17E-02                     | Down                           | -1.50                                    | 2.13E-03                                     | Down                                           |
| Q9Y266  | NUDC   | Nuclear migration protein nudC (Nuclear distribution protein C homolog)                                                                                                                                                                                                                                  | -1.76                    | 1.02E-07                     | Down                           | -2.01                                    | 1.82E-08                                     | Down                                           |
| P46109  | CRKL   | Crk-like protein                                                                                                                                                                                                                                                                                         | -1.79                    | 9.88E-07                     | Down                           | -1.55                                    | 7.64E-06                                     | Down                                           |
| Q96HC4  | PDLIM5 | PDZ and LIM domain protein 5 (Enigma homolog) (Enigma-like PDZ and LIM domains protein)                                                                                                                                                                                                                  | -1.37                    | 1.17E-02                     | Down                           | -1.27                                    | 3.04E-02                                     | Down                                           |
| P04637  | TP53   | Cellular tumor antigen p53 (Antigen NY-CO-13) (Phosphoprotein p53) (Tumor suppressor p53)                                                                                                                                                                                                                | -1.31                    | 1.17E-02                     | Down                           | -1.34                                    | 1.73E-02                                     | Down                                           |
| Q7Z794  | KRT77  | Keratin, type II cytoskeletal 1b (Cytokeratin-1B) (CK-1B) (Keratin-77) (K77) (Type-II keratin Kb39)                                                                                                                                                                                                      | 0.19                     | 8.63E-01                     | Not Sig.                       | -1.64                                    | 1.66E-02                                     | Down                                           |
| P78358  | CTAG1A | Cancer/testis antigen 1 (Autoimmunogenic cancer/testis antigen NY-ESO-1) (Cancer/testis antigen 6.1) (CT6.1) (L antigen family member 2) (LAGE-2)                                                                                                                                                        | -0.79                    | 2.01E-01                     | Not Sig.                       | -1.27                                    | 2.53E-02                                     | Down                                           |
| Q13501  | SQSTM1 | Sequestosome-1 (EBI3-associated protein of 60 kDa) (EBIAP) (p60) (Phosphotyrosine-independent ligand for the Lck SH2 domain of 62 kDa) (Ubiquitin-binding protein p62)                                                                                                                                   | -1.17                    | 9.27E-02                     | Not Sig.                       | -1.60                                    | 2.36E-02                                     | Down                                           |

|        |        |                                                                                                                                                                                                                                                                         |       |          |          |       |          |          |
|--------|--------|-------------------------------------------------------------------------------------------------------------------------------------------------------------------------------------------------------------------------------------------------------------------------|-------|----------|----------|-------|----------|----------|
| P07355 | ANXA2  | Annexin A2 (Annexin II) (Annexin-2) (Calpactin I heavy chain) (Calpactin-1 heavy chain) (Chromobindin-8) (Lipocortin II) (Placental anticoagulant protein IV) (PAP-IV) (Protein I) [p36]                                                                                | 0.16  | 7.15E-01 | Not Sig. | -0.09 | 8.23E-01 | Not Sig. |
| P00390 | GSR    | Glutathione reductase, mitochondrial (GR) (GRase) (EC 1.8.1.7)                                                                                                                                                                                                          | -0.03 | 9.90E-01 | Not Sig. | 0.10  | 9.58E-01 | Not Sig. |
| P09382 | LGALS1 | Galectin-1 (Gal-1) (14 kDa laminin-binding protein) (HLBP14) (14 kDa lectin) (Beta-galactoside-binding lectin L-14-I) (Galaptin) (HBL) (HPL) (Lactose-binding lectin 1) (Lectin galactoside-binding soluble 1) (Putative MAPK-activating protein PM12) (S-Lac lectin 1) | 0.23  | 7.30E-01 | Not Sig. | -0.24 | 6.79E-01 | Not Sig. |
| Q15417 | CNN3   | Calponin-3 (Calponin, acidic isoform)                                                                                                                                                                                                                                   | -0.03 | 9.72E-01 | Not Sig. | 0.13  | 8.36E-01 | Not Sig. |
| P25398 | RPS12  | 40S ribosomal protein S12 (Small ribosomal subunit protein eS12)                                                                                                                                                                                                        | -0.03 | 9.87E-01 | Not Sig. | -0.25 | 7.33E-01 | Not Sig. |
| P09936 | UCHL1  | Ubiquitin carboxyl-terminal hydrolase isozyme L1 (UCH-L1) (EC 3.4.19.12) (Neuron cytoplasmic protein 9.5) (PGP 9.5) (PGP9.5) (Ubiquitin thioesterase L1)                                                                                                                | -0.25 | 7.09E-01 | Not Sig. | -0.20 | 7.41E-01 | Not Sig. |
| P43358 | MAGEA4 | Melanoma-associated antigen 4 (Cancer/testis antigen 1.4) (CT1.4) (MAGE-4 antigen) (MAGE-41 antigen) (MAGE-X2 antigen)                                                                                                                                                  | 0.28  | 5.70E-01 | Not Sig. | 0.11  | 8.36E-01 | Not Sig. |
| P33316 | DUT    | Deoxyuridine 5'-triphosphate nucleotidohydrolase, mitochondrial (dUTPase) (EC 3.6.1.23) (dUTP pyrophosphatase)                                                                                                                                                          | 0.60  | 3.85E-01 | Not Sig. | 0.20  | 8.06E-01 | Not Sig. |
| P10599 | TXN    | Thioredoxin (Trx) (ATL-derived factor) (ADF) (Surface-associated sulphhydryl protein) (SASP) (allergen Hom s Trx)                                                                                                                                                       | 0.25  | 7.45E-01 | Not Sig. | -0.20 | 7.84E-01 | Not Sig. |
| P67936 | TPM4   | Tropomyosin alpha-4 chain (TM30p1) (Tropomyosin-4)                                                                                                                                                                                                                      | -0.14 | 8.30E-01 | Not Sig. | 0.51  | 2.30E-01 | Not Sig. |
| P04080 | CSTB   | Cystatin-B (CPI-B) (Liver thiol proteinase inhibitor) (Stefin-B)                                                                                                                                                                                                        | -0.56 | 6.91E-01 | Not Sig. | 0.10  | 9.66E-01 | Not Sig. |
| P06748 | NPM1   | Nucleophosmin (NPM) (Nucleolar phosphoprotein B23) (Nucleolar protein NO38) (Numatrin)                                                                                                                                                                                  | 0.20  | 7.30E-01 | Not Sig. | 0.39  | 4.04E-01 | Not Sig. |
| P12268 | IMPDH2 | Inosine-5'-monophosphate dehydrogenase 2 (IMP dehydrogenase 2) (IMPDH 2) (EC 1.1.1.205) (Inosine-5'-monophosphate dehydrogenase type II) (IMP dehydrogenase II) (IMPDH-II)                                                                                              | -0.04 | 9.60E-01 | Not Sig. | 0.42  | 3.95E-01 | Not Sig. |
| P61353 | RPL27  | 60S ribosomal protein L27 (Large ribosomal subunit protein eL27)                                                                                                                                                                                                        | -0.59 | 2.83E-01 | Not Sig. | 0.71  | 1.29E-01 | Not Sig. |
| Q96C19 | EFHD2  | EF-hand domain-containing protein D2 (Swiprosin-1)                                                                                                                                                                                                                      | -1.21 | 1.40E-02 | Down     | -0.56 | 3.65E-01 | Not Sig. |
| O15067 | PFAS   | Phosphoribosylformylglycinamide synthase (FGAM synthase) (FGAMS) (EC 6.3.5.3) (Formylglycinamide ribonucleotide amidotransferase) (FGAR amidotransferase) (FGAR-AT) (Formylglycinamide ribotide amidotransferase)                                                       | -1.15 | 9.92E-03 | Down     | -0.34 | 5.49E-01 | Not Sig. |
| Q9Y220 | SUGT1  | Protein SGT1 homolog (Protein 40-6-3) (Sgt1) (Suppressor of G2 allele of SKP1 homolog)                                                                                                                                                                                  | -1.29 | 6.57E-04 | Down     | -0.68 | 8.89E-02 | Not Sig. |
| Q14247 | CTTN   | Src substrate cortactin (Amplixin) (Oncogene EMS1)                                                                                                                                                                                                                      | -1.18 | 2.67E-05 | Down     | -0.44 | 1.15E-01 | Not Sig. |
| Q58717 | TDRD12 | Putative ATP-dependent RNA helicase TDRD12 (EC 3.6.4.13) (ES cell-associated transcript 8 protein) (Tudor domain-containing protein 12)                                                                                                                                 | -1.32 | 9.42E-05 | Down     | -0.98 | 3.74E-03 | Not Sig. |
| P62979 | RPS27A | Ubiquitin-40S ribosomal protein S27a (Ubiquitin carboxyl extension protein 80) [Cleaved into: Ubiquitin; 40S ribosomal protein S27a (Small ribosomal subunit protein eS31)]                                                                                             | -1.43 | 3.93E-03 | Down     | -0.97 | 7.20E-02 | Not Sig. |
| O95817 | BAG3   | BAG family molecular chaperone regulator 3 (BAG-3) (Bcl-2-associated athanogene 3) (Bcl-2-binding protein Bis) (Docking protein CAIR-1)                                                                                                                                 | -1.14 | 6.49E-04 | Down     | -0.55 | 1.14E-01 | Not Sig. |

|        |         |                                                                                                                                                                                                                                                                                                                                                                                                                                                                                             |       |          |          |       |          |          |
|--------|---------|---------------------------------------------------------------------------------------------------------------------------------------------------------------------------------------------------------------------------------------------------------------------------------------------------------------------------------------------------------------------------------------------------------------------------------------------------------------------------------------------|-------|----------|----------|-------|----------|----------|
| P51610 | HCFC1   | Host cell factor 1 (HCF) (HCF-1) (C1 factor) (CFF) (VCAF) (VP16 accessory protein) [Cleared into: HCF N-terminal chain 1; HCF N-terminal chain 2; HCF N-terminal chain 3; HCF N-terminal chain 4; HCF N-terminal chain 5; HCF N-terminal chain 6; HCF C-terminal chain 1; HCF C-terminal chain 2; HCF C-terminal chain 3; HCF C-terminal chain 4; HCF C-terminal chain 5; HCF C-terminal chain 6]                                                                                           | -1.27 | 2.67E-05 | Down     | -0.59 | 5.10E-02 | Not Sig. |
| O14641 | DVL2    | Segment polarity protein dishevelled homolog DVL-2 (Dishevelled-2) (DSH homolog 2)                                                                                                                                                                                                                                                                                                                                                                                                          | -1.30 | 1.45E-04 | Down     | -0.72 | 4.30E-02 | Not Sig. |
| Q9UHR5 | SAP30BP | SAP30-binding protein (Transcriptional regulator protein HCNGP)                                                                                                                                                                                                                                                                                                                                                                                                                             | -1.97 | 1.06E-03 | Down     | -1.23 | 5.61E-02 | Not Sig. |
| O75190 | DNAJB6  | DnaJ homolog subfamily B member 6 (HHD1) (Heat shock protein J2) (HSJ-2) (MRJ) (MSJ-1)                                                                                                                                                                                                                                                                                                                                                                                                      | -1.13 | 2.60E-02 | Down     | -0.70 | 2.04E-01 | Not Sig. |
| P37108 | SRP14   | Signal recognition particle 14 kDa protein (SRP14) (18 kDa Alu RNA-binding protein)                                                                                                                                                                                                                                                                                                                                                                                                         | 0.57  | 1.38E-01 | Not Sig. | 0.17  | 7.46E-01 | Not Sig. |
| P31948 | STIP1   | Stress-induced-phosphoprotein 1 (STI1) (Hsc70/Hsp90-organizing protein) (Hop) (Renal carcinoma antigen NY-REN-11) (Transformation-sensitive protein IEF S5P 3521)                                                                                                                                                                                                                                                                                                                           | -0.96 | 2.83E-04 | Not Sig. | -0.42 | 1.19E-01 | Not Sig. |
| P49327 | FASN    | Fatty acid synthase (EC 2.3.1.85) (Type I fatty acid synthase) [Includes: [Acyl-carrier-protein] S-acyltransferase (EC 2.3.1.38); [Acyl-carrier-protein] S-malonyltransferase (EC 2.3.1.39); 3-oxoacyl-[acyl-carrier-protein] synthase (EC 2.3.1.41); 3-oxoacyl-[acyl-carrier-protein] reductase (EC 1.1.1.100); 3-hydroxyacyl-[acyl-carrier-protein] dehydratase (EC 4.2.1.59); Enoyl-[acyl-carrier-protein] reductase (EC 1.3.1.39); Acyl-[acyl-carrier-protein] hydrolase (EC 3.1.2.14)] | -0.80 | 4.69E-04 | Not Sig. | -0.39 | 1.01E-01 | Not Sig. |
| P62258 | YWHAE   | 14-3-3 protein epsilon (14-3-3E)                                                                                                                                                                                                                                                                                                                                                                                                                                                            | 0.29  | 7.63E-01 | Not Sig. | 0.31  | 7.24E-01 | Not Sig. |
| P02768 | ALB     | Albumin                                                                                                                                                                                                                                                                                                                                                                                                                                                                                     | 0.02  | 9.90E-01 | Not Sig. | 0.40  | 6.77E-01 | Not Sig. |
| P35232 | PHB     | Prohibitin                                                                                                                                                                                                                                                                                                                                                                                                                                                                                  | 0.10  | 9.30E-01 | Not Sig. | 0.29  | 6.99E-01 | Not Sig. |
| Q15149 | PLEC    | Plectin (PCN) (PLTN) (Hemidesmosomal protein 1) (HD1) (Plectin-1)                                                                                                                                                                                                                                                                                                                                                                                                                           | 0.12  | 7.05E-01 | Not Sig. | 0.31  | 1.49E-01 | Not Sig. |
| P62851 | RPS25   | 40S ribosomal protein S25 (Small ribosomal subunit protein eS25)                                                                                                                                                                                                                                                                                                                                                                                                                            | -0.13 | 8.63E-01 | Not Sig. | 0.74  | 1.15E-01 | Not Sig. |
| P62910 | RPL32   | 60S ribosomal protein L32 (Large ribosomal subunit protein eL32)                                                                                                                                                                                                                                                                                                                                                                                                                            | -0.06 | 9.51E-01 | Not Sig. | -0.12 | 8.50E-01 | Not Sig. |
| P78527 | PRKDC   | DNA-dependent protein kinase catalytic subunit (DNA-PK catalytic subunit) (DNA-PKcs) (EC 2.7.11.1) (DNPk1) (p460)                                                                                                                                                                                                                                                                                                                                                                           | -0.05 | 9.52E-01 | Not Sig. | 0.10  | 8.57E-01 | Not Sig. |
| Q9BUF5 | TUBB6   | Tubulin beta-6 chain (Tubulin beta class V)                                                                                                                                                                                                                                                                                                                                                                                                                                                 | 0.47  | 1.31E-01 | Not Sig. | -0.04 | 9.55E-01 | Not Sig. |
| Q08211 | DHX9    | ATP-dependent RNA helicase A (EC 3.6.4.13) (DEAH box protein 9) (DEXH-box helicase 9) (Leukophysin) (LKP) (Nuclear DNA helicase II) (NDH II) (RNA helicase A)                                                                                                                                                                                                                                                                                                                               | 0.12  | 7.09E-01 | Not Sig. | 0.14  | 6.62E-01 | Not Sig. |
| Q15233 | NONO    | Non-POU domain-containing octamer-binding protein (NonO protein) (54 kDa nuclear RNA- and DNA-binding protein) (55 kDa nuclear protein) (DNA-binding p52/p100 complex, 52 kDa subunit) (NMT55) (p54(nrb)) (p54nrb)                                                                                                                                                                                                                                                                          | -0.89 | 1.02E-03 | Not Sig. | -0.64 | 2.93E-02 | Not Sig. |
| P13804 | ETFA    | Electron transfer flavoprotein subunit alpha, mitochondrial (Alpha-ETF)                                                                                                                                                                                                                                                                                                                                                                                                                     | -0.72 | 4.20E-02 | Not Sig. | -0.75 | 4.35E-02 | Not Sig. |
| P02545 | LMNA    | Prelamin-A/C [Cleared into: Lamin-A/C (70 kDa lamin) (Renal carcinoma antigen NY-REN-32)]                                                                                                                                                                                                                                                                                                                                                                                                   | -0.09 | 9.30E-01 | Not Sig. | 0.55  | 4.04E-01 | Not Sig. |
| P05141 | SLC25A5 | ADP/ATP translocase 2 (ADP/ATP carrier protein 2) (ADP/ATP carrier protein, fibroblast isoform) (Adenine nucleotide translocator 2) (ANT 2) (Solute carrier family 25 member 5) [Cleared into:                                                                                                                                                                                                                                                                                              | 0.05  | 9.25E-01 | Not Sig. | -0.06 | 8.86E-01 | Not Sig. |

|        |           |                                                                                                                                                                                                                                                  |       |          |          |       |          |          |
|--------|-----------|--------------------------------------------------------------------------------------------------------------------------------------------------------------------------------------------------------------------------------------------------|-------|----------|----------|-------|----------|----------|
|        |           | ADP/ATP translocase 2, N-terminally processed]                                                                                                                                                                                                   |       |          |          |       |          |          |
| P00558 | PGK1      | Phosphoglycerate kinase 1 (EC 2.7.2.3) (Cell migration-inducing gene 10 protein) (Primer recognition protein 2) (PRP 2)                                                                                                                          | -0.12 | 8.41E-01 | Not Sig. | 0.56  | 1.42E-01 | Not Sig. |
| P61247 | RPS3A     | 40S ribosomal protein S3a (Small ribosomal subunit protein eS1) (v-fos transformation effector protein) (Fte-1)                                                                                                                                  | 0.10  | 8.11E-01 | Not Sig. | 0.05  | 9.08E-01 | Not Sig. |
| P11498 | PC        | Pyruvate carboxylase, mitochondrial (EC 6.4.1.1) (Pyruvic carboxylase) (PCB)                                                                                                                                                                     | 0.06  | 8.41E-01 | Not Sig. | 0.29  | 1.49E-01 | Not Sig. |
| P09622 | DLD       | Dihydrolipoyl dehydrogenase, mitochondrial (EC 1.8.1.4) (Dihydrolipoamide dehydrogenase) (Glycine cleavage system L protein)                                                                                                                     | 0.25  | 7.19E-01 | Not Sig. | -0.38 | 5.12E-01 | Not Sig. |
| P08238 | HSP90A1   | Heat shock protein HSP 90-beta (HSP 90) (Heat shock 84 kDa) (HSP 84) (HSP84)                                                                                                                                                                     | -0.71 | 3.07E-03 | Not Sig. | -0.33 | 2.21E-01 | Not Sig. |
| Q09666 | AHNAK     | Neuroblast differentiation-associated protein AHNAK (Desmoyokin)                                                                                                                                                                                 | -0.16 | 5.31E-01 | Not Sig. | 0.29  | 1.49E-01 | Not Sig. |
| P52272 | HNRNPM    | Heterogeneous nuclear ribonucleoprotein M (hnRNP M)                                                                                                                                                                                              | 0.26  | 4.15E-01 | Not Sig. | 0.21  | 4.94E-01 | Not Sig. |
| Q9H074 | PAIP1     | Polyadenylate-binding protein-interacting protein 1 (PABP-interacting protein 1) (PAIP-1) (Poly(A)-binding protein-interacting protein 1)                                                                                                        | 0.04  | 9.86E-01 | Not Sig. | -0.29 | 7.58E-01 | Not Sig. |
| P68036 | UBE2L3    | Ubiquitin-conjugating enzyme E2 L3 (EC 2.3.2.23) (E2 ubiquitin-conjugating enzyme L3) (L-UBC) (UbcH7) (Ubiquitin carrier protein L3) (Ubiquitin-conjugating enzyme E2-F1) (Ubiquitin-protein ligase L3)                                          | 0.07  | 9.30E-01 | Not Sig. | 0.51  | 2.21E-01 | Not Sig. |
| Q04695 | KRT17     | Keratin, type I cytoskeletal 17 (39.1) (Cytokeratin-17) (CK-17) (Keratin-17) (K17)                                                                                                                                                               | 0.49  | 7.05E-01 | Not Sig. | -0.05 | 9.84E-01 | Not Sig. |
| P13645 | KRT10     | Keratin, type I cytoskeletal 10 (Cytokeratin-10) (CK-10) (Keratin-10) (K10)                                                                                                                                                                      | 0.49  | 6.04E-01 | Not Sig. | -0.79 | 3.06E-01 | Not Sig. |
| Q96P63 | SERPINB12 | Serpin B12                                                                                                                                                                                                                                       | 0.61  | 6.31E-01 | Not Sig. | -1.31 | 1.32E-01 | Not Sig. |
| P62263 | RPS14     | 40S ribosomal protein S14 (Small ribosomal subunit protein uS11)                                                                                                                                                                                 | 0.22  | 5.61E-01 | Not Sig. | 0.21  | 5.37E-01 | Not Sig. |
| P04264 | KRT1      | Keratin, type II cytoskeletal 1 (67 kDa cyokeratin) (Cytokeratin-1) (CK-1) (Hair alpha protein) (Keratin-1) (K1) (Type-II keratin Kb1)                                                                                                           | 0.43  | 5.57E-01 | Not Sig. | -0.62 | 3.06E-01 | Not Sig. |
| P49411 | TUFM      | Elongation factor Tu, mitochondrial (EF-Tu) (P43)                                                                                                                                                                                                | 0.48  | 8.16E-02 | Not Sig. | 0.12  | 7.68E-01 | Not Sig. |
| P15880 | RPS2      | 40S ribosomal protein S2 (40S ribosomal protein S4) (Protein LLRep3) (Small ribosomal subunit protein uS5)                                                                                                                                       | 0.28  | 5.81E-01 | Not Sig. | -0.05 | 9.50E-01 | Not Sig. |
| P82094 | TMF1      | TATA element modulatory factor (TMF) (Androgen receptor coactivator 160 kDa protein) (Androgen receptor-associated protein of 160 kDa)                                                                                                           | -0.76 | 5.81E-01 | Not Sig. | -1.04 | 3.92E-01 | Not Sig. |
| Q14315 | FLNC      | Filamin-C (FLN-C) (FLNc) (ABP-280-like protein) (ABP-L) (Actin-binding-like protein) (Filamin-2) (Gamma-filamin)                                                                                                                                 | 0.14  | 7.05E-01 | Not Sig. | 0.05  | 8.91E-01 | Not Sig. |
| P14618 | PKM       | Pyruvate kinase PKM (EC 2.7.1.40) (Cytosolic thyroid hormone-binding protein) (CTHBP) (Opa-interacting protein 3) (OIP-3) (Pyruvate kinase 2/3) (Pyruvate kinase muscle isozyme) (Thyroid hormone-binding protein 1) (THBP1) (Tumor M2-PK) (p58) | 0.15  | 5.70E-01 | Not Sig. | 0.15  | 5.35E-01 | Not Sig. |
| P19013 | KRT4      | Keratin, type II cytoskeletal 4 (Cytokeratin-4) (CK-4) (Keratin-4) (K4) (Type-II keratin Kb4)                                                                                                                                                    | -0.57 | 7.63E-01 | Not Sig. | 0.03  | 9.86E-01 | Not Sig. |
| P21333 | FLNA      | Filamin-A (FLN-A) (Actin-binding protein 280) (ABP-280) (Alpha-filamin) (Endothelial actin-binding protein) (Filamin-1) (Non-muscle filamin)                                                                                                     | -0.35 | 7.55E-02 | Not Sig. | 0.02  | 9.71E-01 | Not Sig. |
| P15924 | DSP       | Desmoplakin (DP) (250/210 kDa paraneoplastic pemphigus antigen)                                                                                                                                                                                  | 0.43  | 5.56E-01 | Not Sig. | -0.08 | 9.39E-01 | Not Sig. |
| P23396 | RPS3      | 40S ribosomal protein S3 (EC 4.2.99.18) (Small ribosomal subunit protein uS3)                                                                                                                                                                    | 0.25  | 3.68E-01 | Not Sig. | 0.07  | 8.36E-01 | Not Sig. |
| P59998 | ARPC4     | Actin-related protein 2/3 complex subunit 4 (Arp2/3 complex 20 kDa subunit) (p20-ARC)                                                                                                                                                            | 0.24  | 7.64E-01 | Not Sig. | 0.31  | 6.77E-01 | Not Sig. |

|        |        |                                                                                                                                                                                                                                                                 |       |          |          |       |          |          |
|--------|--------|-----------------------------------------------------------------------------------------------------------------------------------------------------------------------------------------------------------------------------------------------------------------|-------|----------|----------|-------|----------|----------|
| P05165 | PCCA   | Propionyl-CoA carboxylase alpha chain, mitochondrial (PCCase subunit alpha) (EC 6.4.1.3) (Propanoyl-CoA:carbon dioxide ligase subunit alpha)                                                                                                                    | 0.04  | 9.27E-01 | Not Sig. | 0.24  | 2.92E-01 | Not Sig. |
| P40429 | RPL13A | 60S ribosomal protein L13a (23 kDa highly basic protein) (Large ribosomal subunit protein uL13)                                                                                                                                                                 | 0.06  | 9.36E-01 | Not Sig. | -0.16 | 7.81E-01 | Not Sig. |
| O75369 | FLNB   | Filamin-B (FLN-B) (ABP-278) (ABP-280 homolog) (Actin-binding-like protein) (Beta-filamin) (Filamin homolog 1) (Fh1) (Filamin-3) (Thyroid autoantigen) (Truncated actin-binding protein) (Truncated ABP)                                                         | 0.03  | 9.60E-01 | Not Sig. | 0.53  | 5.10E-02 | Not Sig. |
| Q81VF2 | AHNAK2 | Protein AHNAK2                                                                                                                                                                                                                                                  | -0.25 | 3.93E-01 | Not Sig. | 0.13  | 6.77E-01 | Not Sig. |
| P17987 | TCP1   | T-complex protein 1 subunit alpha (TCP-1-alpha) (CCT-alpha)                                                                                                                                                                                                     | 0.21  | 5.57E-01 | Not Sig. | 0.05  | 9.06E-01 | Not Sig. |
| P49207 | RPL34  | 60S ribosomal protein L34 (Large ribosomal subunit protein eL34)                                                                                                                                                                                                | 0.24  | 7.34E-01 | Not Sig. | -0.35 | 5.47E-01 | Not Sig. |
| P34897 | SHMT2  | Serine hydroxymethyltransferase, mitochondrial (SHMT) (EC 2.1.2.1) (Glycine hydroxymethyltransferase) (Serine methylase)                                                                                                                                        | 0.60  | 2.25E-01 | Not Sig. | -0.01 | 9.84E-01 | Not Sig. |
| Q9HCC0 | MCC2   | Methylcrotonoyl-CoA carboxylase beta chain, mitochondrial (MCCase subunit beta) (EC 6.4.1.4) (3-methylcrotonoyl-CoA carboxylase 2) (3-methylcrotonoyl-CoA carboxylase non-biotin-containing subunit) (3-methylcrotonoyl-CoA:carbon dioxide ligase subunit beta) | -0.05 | 9.52E-01 | Not Sig. | 0.21  | 6.58E-01 | Not Sig. |
| P04406 | GAPDH  | Glyceraldehyde-3-phosphate dehydrogenase (GAPDH) (EC 1.2.1.12) (Peptidyl-cysteine S-nitrosylase GAPDH) (EC 2.6.99.-)                                                                                                                                            | 0.18  | 6.35E-01 | Not Sig. | -0.05 | 9.27E-01 | Not Sig. |
| P14923 | JUP    | Junction plakoglobin (Catenin gamma) (Desmoplakin III) (Desmoplakin-3)                                                                                                                                                                                          | 0.09  | 9.52E-01 | Not Sig. | 0.15  | 9.06E-01 | Not Sig. |
| P62269 | RPS18  | 40S ribosomal protein S18 (Ke-3) (Ke3) (Small ribosomal subunit protein uS13)                                                                                                                                                                                   | 0.22  | 7.16E-01 | Not Sig. | 0.53  | 2.20E-01 | Not Sig. |
| P25311 | AZGP1  | Zinc-alpha-2-glycoprotein (Zn-alpha-2-GP) (Zn-alpha-2-glycoprotein)                                                                                                                                                                                             | -0.07 | 9.72E-01 | Not Sig. | -0.84 | 4.13E-01 | Not Sig. |
| Q92598 | HSPH1  | Heat shock protein 105 kDa (Antigen NY-CO-25) (Heat shock 110 kDa protein)                                                                                                                                                                                      | -0.42 | 6.96E-01 | Not Sig. | -0.31 | 7.56E-01 | Not Sig. |
| P18583 | SON    | Protein SON (Bax antagonist selected in saccharomyces 1) (BASS1) (Negative regulatory element-binding protein) (NRE-binding protein) (Protein DBP-5) (SON3)                                                                                                     | -0.17 | 8.63E-01 | Not Sig. | -0.35 | 6.76E-01 | Not Sig. |
| P55786 | NPEPP5 | Puromycin-sensitive aminopeptidase (PSA) (EC 3.4.11.14) (Cytosol alanyl aminopeptidase) (AAP-5)                                                                                                                                                                 | 0.54  | 2.51E-01 | Not Sig. | -0.07 | 9.31E-01 | Not Sig. |
| P23526 | AHCY   | Adenosylhomocysteinase (AdoHcyase) (EC 3.3.1.1) (S-adenosyl-L-homocysteine hydrolase)                                                                                                                                                                           | 0.18  | 8.74E-01 | Not Sig. | 0.85  | 2.92E-01 | Not Sig. |
| P39023 | RPL3   | 60S ribosomal protein L3 (HIV-1 TAR RNA-binding protein B) (TARBP-B) (Large ribosomal subunit protein uL3)                                                                                                                                                      | 0.03  | 9.78E-01 | Not Sig. | 0.34  | 5.35E-01 | Not Sig. |
| P18124 | RPL7   | 60S ribosomal protein L7 (Large ribosomal subunit protein uL30)                                                                                                                                                                                                 | -0.09 | 8.63E-01 | Not Sig. | 0.78  | 1.66E-02 | Not Sig. |
| P35268 | RPL22  | 60S ribosomal protein L22 (EBER-associated protein) (EAP) (Epstein-Barr virus small RNA-associated protein) (Heparin-binding protein HbP15) (Large ribosomal subunit protein eL22)                                                                              | 0.66  | 2.53E-01 | Not Sig. | 0.33  | 6.04E-01 | Not Sig. |
| P62424 | RPL7A  | 60S ribosomal protein L7a (Large ribosomal subunit protein eL8) (PLA-X polypeptide) (Surfeit locus protein 3)                                                                                                                                                   | -0.07 | 9.52E-01 | Not Sig. | 0.25  | 7.15E-01 | Not Sig. |
| P62266 | RPS23  | 40S ribosomal protein S23 (Small ribosomal subunit protein uS12)                                                                                                                                                                                                | -0.25 | 6.01E-01 | Not Sig. | -0.37 | 3.65E-01 | Not Sig. |
| P22102 | GART   | Trifunctional purine biosynthetic protein adenosine-3 [Includes: Phosphoribosylamine-glycine ligase (EC 6.3.4.13) (Glycinamide ribonucleotide synthetase) (GARS) (Phosphoribosylglycinamid                                                                      | -0.09 | 8.83E-01 | Not Sig. | 0.09  | 8.53E-01 | Not Sig. |

|        |         |                                                                                                                                                                                                                                                                                                                                                                         |       |          |          |       |          |          |
|--------|---------|-------------------------------------------------------------------------------------------------------------------------------------------------------------------------------------------------------------------------------------------------------------------------------------------------------------------------------------------------------------------------|-------|----------|----------|-------|----------|----------|
|        |         | e synthetase); Phosphoribosylformylglycinamide cyclo-ligase (EC 6.3.3.1) (AIR synthase) (AIRS) (Phosphoribosyl-aminimidazole synthetase); Phosphoribosylglycinamide formyltransferase (EC 2.1.2.2) (5'-phosphoribosylglycinamide transformylase) (GAR transformylase) (GART)                                                                                            |       |          |          |       |          |          |
| P31327 | CPS1    | Carbamoyl-phosphate synthase [ammonia], mitochondrial (EC 6.3.4.16) (Carbamoyl-phosphate synthetase I) (CPSase I)                                                                                                                                                                                                                                                       | 0.22  | 8.63E-01 | Not Sig. | 0.62  | 5.01E-01 | Not Sig. |
| P22735 | TGM1    | Protein-glutamine gamma-glutamyltransferase K (EC 2.3.2.13) (Epidermal TGase) (Transglutaminase K) (TG(K)) (TGK) (TGase K) (Transglutaminase-1) (TGase-1)                                                                                                                                                                                                               | 0.24  | 8.63E-01 | Not Sig. | -0.89 | 3.54E-01 | Not Sig. |
| P62081 | RPS7    | 40S ribosomal protein S7 (Small ribosomal subunit protein e57)                                                                                                                                                                                                                                                                                                          | 0.06  | 9.52E-01 | Not Sig. | 0.14  | 8.46E-01 | Not Sig. |
| Q9NQH7 | XPNPEP3 | Xaa-Pro aminopeptidase 3 (X-Pro aminopeptidase 3) (EC 3.4.11.9) (Aminopeptidase P3) (APP3)                                                                                                                                                                                                                                                                              | -0.61 | 3.85E-01 | Not Sig. | 0.00  | 9.99E-01 | Not Sig. |
| Q02878 | RPL6    | 60S ribosomal protein L6 (Large ribosomal subunit protein eL6) (Neoplasm-related protein C140) (Tax-responsive enhancer element-binding protein 107) (TaxREB107)                                                                                                                                                                                                        | -0.06 | 9.52E-01 | Not Sig. | 0.60  | 1.56E-01 | Not Sig. |
| Q99614 | TTC1    | Tetratricopeptide repeat protein 1 (TPR repeat protein 1)                                                                                                                                                                                                                                                                                                               | -0.54 | 4.15E-01 | Not Sig. | -0.67 | 2.31E-01 | Not Sig. |
| P83731 | RPL24   | 60S ribosomal protein L24 (60S ribosomal protein L30) (Large ribosomal subunit protein eL24)                                                                                                                                                                                                                                                                            | -0.01 | 9.94E-01 | Not Sig. | 0.30  | 6.79E-01 | Not Sig. |
| P14866 | HNRNPL  | Heterogeneous nuclear ribonucleoprotein L (hnRNP L)                                                                                                                                                                                                                                                                                                                     | 0.32  | 2.46E-01 | Not Sig. | 0.49  | 4.89E-02 | Not Sig. |
| Q15366 | PCBP2   | Poly(rC)-binding protein 2 (Alpha-CP2) (Heterogeneous nuclear ribonucleoprotein E2) (hnRNP E2)                                                                                                                                                                                                                                                                          | -0.07 | 9.08E-01 | Not Sig. | -0.12 | 7.84E-01 | Not Sig. |
| Q02952 | AKAP12  | A-kinase anchor protein 12 (AKAP-12) (A-kinase anchor protein 250 kDa) (AKAP 250) (Gravin) (Myasthenia gravis autoantigen)                                                                                                                                                                                                                                              | -0.04 | 9.88E-01 | Not Sig. | -0.54 | 5.35E-01 | Not Sig. |
| Q13642 | FHL1    | Four and a half LIM domains protein 1 (FHL-1) (Skeletal muscle LIM-protein 1) (SLIM) (SLIM-1)                                                                                                                                                                                                                                                                           | -0.01 | 9.90E-01 | Not Sig. | 0.09  | 8.53E-01 | Not Sig. |
| P08865 | RPSA    | 40S ribosomal protein SA (37 kDa laminin receptor precursor) (37LRP) (37/67 kDa laminin receptor) (LRP/LR) (67 kDa laminin receptor) (67LR) (Colon carcinoma laminin-binding protein) (Laminin receptor 1) (LamR) (Laminin-binding protein precursor p40) (LBP/p40) (Multidrug resistance-associated protein MGR1-Ag) (NEM/1CHD4) (Small ribosomal subunit protein uS2) | -0.47 | 6.89E-01 | Not Sig. | 0.22  | 8.36E-01 | Not Sig. |
| P16401 | H1-5    | Histone H1.5 (Histone H1a) (Histone H1b) (Histone H1s-3)                                                                                                                                                                                                                                                                                                                | 0.08  | 9.60E-01 | Not Sig. | 1.36  | 8.89E-02 | Not Sig. |
| P49368 | CCT3    | T-complex protein 1 subunit gamma (TCP-1-gamma) (CCT-gamma) (hTRIC5)                                                                                                                                                                                                                                                                                                    | 0.41  | 4.01E-02 | Not Sig. | -0.07 | 8.23E-01 | Not Sig. |
| P35998 | PSMC2   | 26S proteasome regulatory subunit 7 (26S proteasome AAA-ATPase subunit RPT1) (Proteasome 26S subunit ATPase 2) (Protein MSS1)                                                                                                                                                                                                                                           | -0.27 | 7.88E-01 | Not Sig. | -0.33 | 7.15E-01 | Not Sig. |
| P35579 | MYH9    | Myosin-9 (Cellular myosin heavy chain, type A) (Myosin heavy chain 9) (Myosin heavy chain, non-muscle IIa) (Non-muscle myosin heavy chain A) (NMMHC-A) (Non-muscle myosin heavy chain IIa) (NMMHC II-a) (NMMHC-IIA)                                                                                                                                                     | -0.34 | 1.49E-01 | Not Sig. | 0.04  | 9.06E-01 | Not Sig. |
| Q99832 | CCT7    | T-complex protein 1 subunit eta (TCP-1-eta) (CCT-eta) (HIV-1 Nef-interacting protein) [Cleaved into: T-complex protein 1 subunit eta, N-terminally processed]                                                                                                                                                                                                           | 0.30  | 2.84E-01 | Not Sig. | -0.06 | 8.55E-01 | Not Sig. |
| Q02790 | FKBP4   | Peptidyl-prolyl cis-trans isomerase FKBP4 (PPIase FKBP4) (EC 5.2.1.8) (51 kDa                                                                                                                                                                                                                                                                                           | -0.73 | 3.06E-01 | Not Sig. | -0.47 | 5.17E-01 | Not Sig. |

|        |          |                                                                                                                                                                                                                                                                                                                   |       |          |          |       |          |          |
|--------|----------|-------------------------------------------------------------------------------------------------------------------------------------------------------------------------------------------------------------------------------------------------------------------------------------------------------------------|-------|----------|----------|-------|----------|----------|
|        |          | FK506-binding protein (FKBP51) (52 kDa FK506-binding protein) (52 kDa FKBP) (FKBP-52) (59 kDa immunophilin) (p59) (FK506-binding protein 4) (FKBP-4) (FKBP59) (HSP-binding immunophilin) (HBI) (Immunophilin FKBP52) (Rotamase) [Cleared into: Peptidyl-prolyl cis-trans isomerase FKBP4, N-terminally processed] |       |          |          |       |          |          |
| P19338 | NCL      | Nucleolin (Protein C23)                                                                                                                                                                                                                                                                                           | 0.28  | 4.77E-01 | Not Sig. | 0.72  | 1.66E-02 | Not Sig. |
| Q96QA5 | GSDMA    | Gasdermin-A (Gasdermin-1) [Cleared into: Gasdermin-A, N-terminal (GSDMA-NT); Gasdermin-A, C-terminal (GSDMA-CT)]                                                                                                                                                                                                  | 0.31  | 8.11E-01 | Not Sig. | -0.65 | 5.37E-01 | Not Sig. |
| Q9Y490 | TLN1     | Talin-1                                                                                                                                                                                                                                                                                                           | -0.06 | 9.30E-01 | Not Sig. | -0.08 | 8.57E-01 | Not Sig. |
| P26641 | EEF1G    | Elongation factor 1-gamma (EF-1-gamma) (eEF-1B gamma)                                                                                                                                                                                                                                                             | 0.00  | 9.94E-01 | Not Sig. | 0.01  | 9.86E-01 | Not Sig. |
| P23381 | WARS1    | Tryptophan--tRNA ligase, cytoplasmic (EC 6.1.1.2) (Interferon-induced protein 53) (IFP53) (Tryptophanyl-tRNA synthetase) (TrpRS) (hWRS) [Cleared into: T1-TrpRS; T2-TrpRS]                                                                                                                                        | 0.03  | 9.86E-01 | Not Sig. | -0.29 | 6.79E-01 | Not Sig. |
| P57088 | TMEM33   | Transmembrane protein 33 (Protein DB83) (SHINC-3)                                                                                                                                                                                                                                                                 | -0.18 | 8.63E-01 | Not Sig. | -0.58 | 4.32E-01 | Not Sig. |
| P07900 | HSP90AA1 | Heat shock protein HSP 90-alpha (EC 3.6.4.10) (Heat shock 86 kDa) (HSP 86) (HSP86) (Lipopolysaccharide-associated protein 2) (LAP-2) (LPS-associated protein 2) (Renal carcinoma antigen NY-REN-38)                                                                                                               | -0.22 | 5.87E-01 | Not Sig. | 0.03  | 9.66E-01 | Not Sig. |
| P10809 | HSPD1    | 60 kDa heat shock protein, mitochondrial (EC 5.6.1.7) (60 kDa chaperonin) (Chaperonin 60) (CPN60) (Heat shock protein 60) (HSP-60) (Hsp60) (HuCHA60) (Mitochondrial matrix protein P1) (P60 lymphocyte protein)                                                                                                   | 0.30  | 4.15E-01 | Not Sig. | 0.21  | 5.49E-01 | Not Sig. |
| P05109 | S100A8   | Protein S100-A8 (Calgranulin-A) (Calprotectin L1L subunit) (Cystic fibrosis antigen) (CFAG) (Leukocyte L1 complex light chain) (Migration inhibitory factor-related protein 8) (MRP-8) (p8) (S100 calcium-binding protein A8) (Urinary stone protein band A)                                                      | -0.40 | 8.11E-01 | Not Sig. | -0.28 | 8.53E-01 | Not Sig. |
| P27816 | MAP4     | Microtubule-associated protein 4 (MAP-4)                                                                                                                                                                                                                                                                          | 0.49  | 5.61E-02 | Not Sig. | 0.27  | 3.95E-01 | Not Sig. |
| P40227 | CCT6A    | T-complex protein 1 subunit zeta (TCP-1-zeta) (Acute morphine dependence-related protein 2) (CCT-zeta-1) (HTR3) (Tcp20)                                                                                                                                                                                           | 0.26  | 5.92E-01 | Not Sig. | -0.07 | 9.06E-01 | Not Sig. |
| P26640 | VAR51    | Valine--tRNA ligase (EC 6.1.1.9) (Protein G7a) (Valyl-tRNA synthetase) (ValRS)                                                                                                                                                                                                                                    | 0.31  | 7.05E-01 | Not Sig. | 0.19  | 8.06E-01 | Not Sig. |
| P04083 | ANXA1    | Annexin A1 (Annexin I) (Annexin-1) (Calpactin II) (Calpactin-2) (Chromobindin-9) (Lipocortin I) (Phospholipase A2 inhibitory protein) [p35]                                                                                                                                                                       | -0.47 | 7.15E-01 | Not Sig. | 0.24  | 8.47E-01 | Not Sig. |
| Q86VP6 | CAND1    | Cullin-associated NEDD8-dissociated protein 1 (Cullin-associated and neddylation-dissociated protein 1) (TBP-interacting protein of 120 kDa A) (TBP-interacting protein 120A) (p120 CAND1)                                                                                                                        | 0.22  | 7.30E-01 | Not Sig. | 0.44  | 3.95E-01 | Not Sig. |
| P04843 | RPN1     | Dolichyl-diphosphooligosaccharide-protein glycosyltransferase subunit 1 (Dolichyl-diphosphooligosaccharide-protein glycosyltransferase 67 kDa subunit) (Ribophorin I) (RPN-I) (Ribophorin-1)                                                                                                                      | 0.03  | 9.72E-01 | Not Sig. | 0.05  | 9.43E-01 | Not Sig. |
| P07437 | TUBB     | Tubulin beta chain (Tubulin beta-5 chain)                                                                                                                                                                                                                                                                         | 0.25  | 4.50E-01 | Not Sig. | 0.28  | 3.36E-01 | Not Sig. |
| P55010 | EIF5     | Eukaryotic translation initiation factor 5 (eIF-5)                                                                                                                                                                                                                                                                | -0.44 | 1.45E-01 | Not Sig. | -0.50 | 8.89E-02 | Not Sig. |
| P54577 | YARS1    | Tyrosine--tRNA ligase, cytoplasmic (EC 6.1.1.1) (Tyrosyl-tRNA synthetase) (TyRS) [Cleared into: Tyrosine--tRNA ligase, cytoplasmic, N-terminally processed]                                                                                                                                                       | -0.42 | 4.81E-01 | Not Sig. | 0.37  | 5.12E-01 | Not Sig. |

|        |        |                                                                                                                                                                                                                                                              |       |          |          |       |          |          |
|--------|--------|--------------------------------------------------------------------------------------------------------------------------------------------------------------------------------------------------------------------------------------------------------------|-------|----------|----------|-------|----------|----------|
| P38646 | HSPA9  | Stress-70 protein, mitochondrial (75 kDa glucose-regulated protein) (GRP-75) (Heat shock 70 kDa protein 9) (Mortalin) (MOT) (Peptide-binding protein 74) (PBP74)                                                                                             | 0.11  | 8.63E-01 | Not Sig. | -0.09 | 8.77E-01 | Not Sig. |
| Q96RQ3 | MCCC1  | Methylcrotonyl-CoA carboxylase subunit alpha, mitochondrial (MCCase subunit alpha) (EC 6.4.1.4) (3-methylcrotonyl-CoA carboxylase 1) (3-methylcrotonyl-CoA carboxylase biotin-containing subunit) (3-methylcrotonyl-CoA:carbon dioxide ligase subunit alpha) | -0.02 | 9.60E-01 | Not Sig. | 0.23  | 3.47E-01 | Not Sig. |
| P55265 | ADAR   | Double-stranded RNA-specific adenosine deaminase (DRADA) (EC 3.5.4.37) (136 kDa double-stranded RNA-binding protein) (p136) (Interferon-inducible protein 4) (IFI-4) (K88DSRBP)                                                                              | -0.41 | 6.43E-01 | Not Sig. | 0.09  | 9.39E-01 | Not Sig. |
| P46063 | RECQL  | ATP-dependent DNA helicase Q1 (EC 3.6.4.12) (DNA helicase, RecQ-like type 1) (RecQ1) (DNA-dependent ATPase Q1) (RecQ protein-like 1)                                                                                                                         | 0.02  | 9.89E-01 | Not Sig. | 0.15  | 8.29E-01 | Not Sig. |
| O00560 | SDCBP  | Syntenin-1 (Melanoma differentiation-associated protein 9) (MDA-9) (Pro-TGF-alpha cytoplasmic domain-interacting protein 18) (TACIP18) (Scaffold protein Pbp1) (Syndecan-binding protein 1)                                                                  | -0.82 | 2.53E-03 | Not Sig. | -0.81 | 4.83E-03 | Not Sig. |
| P35637 | FUS    | RNA-binding protein FUS (75 kDa DNA-pairing protein) (Oncogene FUS) (Oncogene TLS) (POMp75) (Translocated in liposarcoma protein)                                                                                                                            | 0.17  | 8.63E-01 | Not Sig. | 0.43  | 5.35E-01 | Not Sig. |
| P08779 | KRT16  | Keratin, type I cytoskeletal 16 (Cytokeratin-16) (CK-16) (Keratin-16) (K16)                                                                                                                                                                                  | 0.41  | 8.63E-01 | Not Sig. | -1.30 | 4.29E-01 | Not Sig. |
| P02533 | KRT14  | Keratin, type I cytoskeletal 14 (Cytokeratin-14) (CK-14) (Keratin-14) (K14)                                                                                                                                                                                  | 0.33  | 7.97E-01 | Not Sig. | -0.63 | 5.35E-01 | Not Sig. |
| P01889 | HLA-B  | HLA class I histocompatibility antigen, B alpha chain (Human leukocyte antigen B) (HLA-B)                                                                                                                                                                    | -0.24 | 7.34E-01 | Not Sig. | 0.05  | 9.66E-01 | Not Sig. |
| P35754 | GLRX   | Glutaredoxin-1 (Thioltransferase-1) (TTase-1)                                                                                                                                                                                                                | -0.20 | 8.63E-01 | Not Sig. | -0.08 | 9.58E-01 | Not Sig. |
| P04792 | HSPB1  | Heat shock protein beta-1 (HspB1) (28 kDa heat shock protein) (Estrogen-regulated 24 kDa protein) (Heat shock 27 kDa protein) (HSP 27) (Stress-responsive protein 27) (SRP27)                                                                                | -0.96 | 2.50E-03 | Not Sig. | -0.25 | 5.37E-01 | Not Sig. |
| P26038 | MSN    | Moesin (Membrane-organizing extension spike protein)                                                                                                                                                                                                         | 0.28  | 7.64E-01 | Not Sig. | 0.27  | 7.67E-01 | Not Sig. |
| P18206 | VCL    | Vinculin (Metavinculin) (MV)                                                                                                                                                                                                                                 | -0.24 | 8.11E-01 | Not Sig. | 0.34  | 7.15E-01 | Not Sig. |
| O00763 | ACACB  | Acetyl-CoA carboxylase 2 (EC 6.4.1.2) (ACC-beta)                                                                                                                                                                                                             | 0.20  | 4.77E-01 | Not Sig. | 0.44  | 4.35E-02 | Not Sig. |
| Q9NSB4 | KRT82  | Keratin, type II cuticular Hb2 (Keratin-82) (K82) (Type II hair keratin Hb2) (Type-II keratin Kb22)                                                                                                                                                          | -0.35 | 9.39E-01 | Not Sig. | 2.52  | 3.19E-01 | Not Sig. |
| P13647 | KRT5   | Keratin, type II cytoskeletal 5 (58 kDa cyokeratin) (Cytokeratin-5) (CK-5) (Keratin-5) (K5) (Type-II keratin Kb5)                                                                                                                                            | 0.38  | 7.16E-01 | Not Sig. | -0.36 | 7.15E-01 | Not Sig. |
| P62917 | RPL8   | 60S ribosomal protein L8 (Large ribosomal subunit protein uL2)                                                                                                                                                                                               | -0.36 | 5.30E-01 | Not Sig. | -0.18 | 7.81E-01 | Not Sig. |
| O15144 | ARPC2  | Actin-related protein 2/3 complex subunit 2 (Arp2/3 complex 34 kDa subunit) (p34-ARC)                                                                                                                                                                        | 0.52  | 4.80E-01 | Not Sig. | 0.11  | 9.10E-01 | Not Sig. |
| O15143 | ARPC1B | Actin-related protein 2/3 complex subunit 1B (Arp2/3 complex 41 kDa subunit) (p41-ARC)                                                                                                                                                                       | 0.33  | 7.41E-01 | Not Sig. | -0.60 | 4.51E-01 | Not Sig. |
| P78344 | EIF4G2 | Eukaryotic translation initiation factor 4 gamma 2 (eIF-4-gamma 2) (eIF-4G 2) (eIF4G 2) (Death-associated protein 5) (DAP-5) (p97)                                                                                                                           | -0.42 | 5.04E-02 | Not Sig. | -0.39 | 8.89E-02 | Not Sig. |
| P35658 | NUP214 | Nuclear pore complex protein Nup214 (214 kDa nucleoporin) (Nucleoporin Nup214) (Protein CAN)                                                                                                                                                                 | -0.15 | 8.06E-01 | Not Sig. | -0.33 | 4.84E-01 | Not Sig. |
| P12270 | TPR    | Nucleoprotein TPR (Megator) (NPC-associated intranuclear protein) (Translocated promoter region protein)                                                                                                                                                     | -0.84 | 6.49E-04 | Not Sig. | -0.72 | 4.83E-03 | Not Sig. |



|        |         |                                                                                                                                                                                                                                                  |       |          |          |       |          |          |
|--------|---------|--------------------------------------------------------------------------------------------------------------------------------------------------------------------------------------------------------------------------------------------------|-------|----------|----------|-------|----------|----------|
| Q96PK6 | RBM14   | RNA-binding protein 14 (Paraspeckle protein 2) (PSP2) (RNA-binding motif protein 14) (RRM-containing coactivator activator/modulator) (Synaptotagmin-interacting protein) (SYT-interacting protein)                                              | 0.22  | 6.83E-01 | Not Sig. | 0.29  | 4.97E-01 | Not Sig. |
| Q16698 | DECR1   | 2,4-dienoyl-CoA reductase [(3E)-enoyl-CoA-producing], mitochondrial (EC 1.3.1.124) (2,4-dienoyl-CoA reductase [NADPH]) (4-enoyl-CoA reductase [NADPH]) (Short chain dehydrogenase/reductase family 18C member 1)                                 | 0.08  | 9.60E-01 | Not Sig. | 0.28  | 8.05E-01 | Not Sig. |
| Q06830 | PRDX1   | Peroxiredoxin-1 (EC 1.11.1.24) (Natural killer cell-enhancing factor A) (NKEF-A) (Proliferation-associated gene protein) (PAG) (Thioredoxin peroxidase 2) (Thioredoxin-dependent peroxide reductase 2) (Thioredoxin-dependent peroxidoredoxin 1) | 0.30  | 4.23E-01 | Not Sig. | 0.13  | 7.46E-01 | Not Sig. |
| Q5T749 | KPRP    | Keratinocyte proline-rich protein (hKPRP)                                                                                                                                                                                                        | 0.47  | 6.91E-01 | Not Sig. | -0.63 | 5.17E-01 | Not Sig. |
| P04259 | KRT6B   | Keratin, type II cytoskeletal 6B (Cytokeratin-6B) (CK-6B) (Keratin-6B) (K6B) (Type-II keratin Kb10)                                                                                                                                              | 0.15  | 9.52E-01 | Not Sig. | -2.36 | 5.19E-02 | Not Sig. |
| Q6SA08 | TSSK4   | Testis-specific serine/threonine-protein kinase 4 (TSK-4) (TSSK-4) (Testis-specific kinase 4) (EC 2.7.11.1) (Serine/threonine-protein kinase 22E)                                                                                                | -0.16 | 9.27E-01 | Not Sig. | 0.69  | 4.94E-01 | Not Sig. |
| Q8N1N4 | KRT78   | Keratin, type II cytoskeletal 78 (Cytokeratin-78) (CK-78) (Keratin-Sb) (Keratin-78) (K78) (Type-II keratin Kb40)                                                                                                                                 | 0.57  | 4.81E-01 | Not Sig. | -0.87 | 1.78E-01 | Not Sig. |
| Q13085 | ACACA   | Acetyl-CoA carboxylase 1 (ACC1) (EC 6.4.1.2) (Acetyl-Coenzyme A carboxylase alpha) (ACC-alpha)                                                                                                                                                   | 0.38  | 4.33E-02 | Not Sig. | 0.02  | 9.66E-01 | Not Sig. |
| O00154 | ACOT7   | Cytosolic acyl coenzyme A thioester hydrolase (EC 3.1.2.2) (Acyl-CoA thioesterase 7) (Brain acyl-CoA hydrolase) (BACH) (hBACH) (CTE-IIa) (CTE-II) (Long chain acyl-CoA thioester hydrolase)                                                      | 0.28  | 3.89E-01 | Not Sig. | -0.02 | 9.71E-01 | Not Sig. |
| P60842 | EIF4A1  | Eukaryotic initiation factor 4A-1 (eIF-4A-1) (eIF4A-1) (EC 3.6.4.13) (ATP-dependent RNA helicase eIF4A-1)                                                                                                                                        | 0.16  | 6.07E-01 | Not Sig. | 0.11  | 7.15E-01 | Not Sig. |
| Q14574 | DSC3    | Desmocollin-3 (Cadherin family member 3) (Desmocollin-4) (HT-CP)                                                                                                                                                                                 | 0.03  | 9.90E-01 | Not Sig. | -0.44 | 6.77E-01 | Not Sig. |
| O00487 | PSMD14  | 26S proteasome non-ATPase regulatory subunit 14 (EC 3.4.19.-) (26S proteasome regulatory subunit RPN11) (26S proteasome-associated PAD1 homolog 1)                                                                                               | -0.41 | 6.33E-01 | Not Sig. | -0.25 | 7.77E-01 | Not Sig. |
| P25705 | ATP5F1A | ATP synthase subunit alpha, mitochondrial (ATP synthase F1 subunit alpha)                                                                                                                                                                        | 0.19  | 7.63E-01 | Not Sig. | 0.02  | 9.84E-01 | Not Sig. |
| P06733 | ENO1    | Alpha-enolase (EC 4.2.1.11) (2-phospho-D-glycerate hydro-lyase) [C-myc promoter-binding protein] (Enolase 1) (MBP-1) (MPB-1) (Non-neural enolase) (NNE) (Phosphopyruvate hydratase) (Plasminogen-binding protein)                                | 0.34  | 4.15E-01 | Not Sig. | 0.28  | 4.88E-01 | Not Sig. |
| P05023 | ATP1A1  | Sodium/potassium-transporting ATPase subunit alpha-1 (Na(+)/K(+)-ATPase alpha-1 subunit) (EC 7.2.2.13) (Sodium pump subunit alpha-1)                                                                                                             | -0.86 | 4.96E-01 | Not Sig. | -0.06 | 9.84E-01 | Not Sig. |
| P23528 | CFL1    | Cofilin-1 (18 kDa phosphoprotein) (p18) (Cofilin, non-muscle isoform)                                                                                                                                                                            | -0.06 | 9.09E-01 | Not Sig. | -0.08 | 8.32E-01 | Not Sig. |
| Q13835 | PKP1    | Plakophilin-1 (Band 6 protein) (B6P)                                                                                                                                                                                                             | 0.38  | 7.43E-01 | Not Sig. | 0.22  | 8.36E-01 | Not Sig. |
| P27348 | YWHAQ   | 14-3-3 protein theta (14-3-3 protein T-cell) (14-3-3 protein tau) (Protein HS1)                                                                                                                                                                  | -0.13 | 9.10E-01 | Not Sig. | 0.04  | 9.84E-01 | Not Sig. |
| P47929 | LGALS7  | Galectin-7 (Gal-7) (HKL-14) (PI7) (p53-induced gene 1 protein)                                                                                                                                                                                   | -0.82 | 3.46E-01 | Not Sig. | -0.40 | 6.79E-01 | Not Sig. |
| O75390 | CS      | Citrate synthase, mitochondrial (EC 2.3.3.1) (Citrate [S]-synthase)                                                                                                                                                                              | 0.17  | 7.63E-01 | Not Sig. | 0.36  | 4.17E-01 | Not Sig. |
| P50991 | CCT4    | T-complex protein 1 subunit delta (TCP-1-delta) (CCT-delta) (Stimulator of TAR RNA-binding)                                                                                                                                                      | 0.24  | 5.30E-01 | Not Sig. | 0.06  | 8.92E-01 | Not Sig. |
| P54136 | RARS1   | Arginine-tRNA ligase, cytoplasmic (EC 6.1.1.19)                                                                                                                                                                                                  | 0.00  | 9.94E-01 | Not Sig. | -0.15 | 7.84E-01 | Not Sig. |

|        |         |                                                                                                                                                                                                                                                                                                                    |       |          |          |       |          |          |
|--------|---------|--------------------------------------------------------------------------------------------------------------------------------------------------------------------------------------------------------------------------------------------------------------------------------------------------------------------|-------|----------|----------|-------|----------|----------|
|        |         | (Arginyl-tRNA synthetase) (ArgRS)                                                                                                                                                                                                                                                                                  |       |          |          |       |          |          |
| P07814 | EPRS1   | Bifunctional glutamate/proline-tRNA ligase (Bifunctional aminoacyl-tRNA synthetase) (Cell proliferation-inducing gene 32 protein) (Glutamyl-prolyl-tRNA synthetase) [Includes: Glutamate-tRNA ligase (EC 6.1.1.17) (Glutamyl-tRNA synthetase) (GluRS); Proline-tRNA ligase (EC 6.1.1.15) (Prolyl-tRNA synthetase)] | 0.27  | 8.11E-01 | Not Sig. | -0.39 | 6.96E-01 | Not Sig. |
| Q99439 | CNN2    | Calponin-2 (Calponin H2, smooth muscle) (Neutral calponin)                                                                                                                                                                                                                                                         | -0.39 | 7.43E-01 | Not Sig. | -0.51 | 6.29E-01 | Not Sig. |
| P13639 | EEF2    | Elongation factor 2 (EF-2)                                                                                                                                                                                                                                                                                         | 0.01  | 9.86E-01 | Not Sig. | 0.14  | 6.77E-01 | Not Sig. |
| P31949 | S100A11 | Protein S100-A11 (Calgizzarin) (Metastatic lymph node gene 70 protein) (MLN 70) (Protein S100-C) (S100 calcium-binding protein A11) [Cleaved into: Protein S100-A11, N-terminally processed]                                                                                                                       | -0.03 | 9.89E-01 | Not Sig. | -0.16 | 8.76E-01 | Not Sig. |
| P50914 | RPL14   | 60S ribosomal protein L14 (CAG-ISL 7) (Large ribosomal subunit protein eL14)                                                                                                                                                                                                                                       | -0.24 | 7.45E-01 | Not Sig. | 0.43  | 4.88E-01 | Not Sig. |
| Q5T750 | XP32    | Skin-specific protein 32                                                                                                                                                                                                                                                                                           | 0.07  | 9.72E-01 | Not Sig. | -0.22 | 8.82E-01 | Not Sig. |
| Q14192 | FHL2    | Four and a half LIM domains protein 2 (FHL-2) (LIM domain protein DRAL) (Skeletal muscle LIM-protein 3) (SLIM-3)                                                                                                                                                                                                   | -0.38 | 4.89E-01 | Not Sig. | -0.22 | 7.15E-01 | Not Sig. |
| P21291 | CSRP1   | Cysteine and glycine-rich protein 1 (Cysteine-rich protein 1) (CRP) (CRP1) (Epididymis luminal protein 141) (HEL-141)                                                                                                                                                                                              | 0.49  | 4.15E-01 | Not Sig. | 0.71  | 1.42E-01 | Not Sig. |
| P07737 | PFN1    | Profilin-1 (Epididymis tissue protein Li 184a) (Profilin 1)                                                                                                                                                                                                                                                        | -0.41 | 1.22E-01 | Not Sig. | 0.51  | 5.10E-02 | Not Sig. |
| Q08188 | TGM3    | Protein-glutamine gamma-glutamyltransferase E (EC 2.3.2.13) (Transglutaminase E) (TG(E)) (TGE) (TGase E) (Transglutaminase-3) (TGase-3) [Cleaved into: Protein-glutamine gamma-glutamyltransferase E 50 kDa catalytic chain; Protein-glutamine gamma-glutamyltransferase E 27 kDa non-catalytic chain]             | 0.40  | 7.43E-01 | Not Sig. | -0.72 | 4.83E-01 | Not Sig. |
| Q01130 | SRSF2   | Serine/arginine-rich splicing factor 2 (Protein PR264) (Splicing component, 35 kDa) (Splicing factor SC35) (SC-35) (Splicing factor, arginine/serine-rich 2)                                                                                                                                                       | 0.04  | 9.89E-01 | Not Sig. | 1.07  | 1.77E-01 | Not Sig. |
| P11021 | HSPA5   | Endoplasmic reticulum chaperone BiP (EC 3.6.4.10) (78 kDa glucose-regulated protein) (GRP-78) (Binding-immunoglobulin protein) (BiP) (Heat shock protein 70 family protein 5) (HSP70 family protein 5) (Heat shock protein family A member 5) (Immunoglobulin heavy chain-binding protein)                         | -0.14 | 6.83E-01 | Not Sig. | 0.07  | 8.23E-01 | Not Sig. |
| P02656 | APOC3   | Apolipoprotein C-III (Apo-CIII) (ApoC-III) (Apolipoprotein C3)                                                                                                                                                                                                                                                     | -0.31 | 6.96E-01 | Not Sig. | 0.38  | 5.49E-01 | Not Sig. |
| Q15717 | ELAVL1  | ELAV-like protein 1 (Hu-antigen R) (HuR)                                                                                                                                                                                                                                                                           | 0.72  | 2.05E-01 | Not Sig. | -0.45 | 4.85E-01 | Not Sig. |
| P78371 | CCT2    | T-complex protein 1 subunit beta (TCP-1-beta) (CCT-beta)                                                                                                                                                                                                                                                           | 0.09  | 8.78E-01 | Not Sig. | -0.01 | 9.84E-01 | Not Sig. |
| O95433 | AHSA1   | Activator of 90 kDa heat shock protein ATPase homolog 1 (AHA1) (p38)                                                                                                                                                                                                                                               | 0.30  | 4.77E-01 | Not Sig. | -0.13 | 7.84E-01 | Not Sig. |
| P81605 | DCD     | Dermcidin (EC 3.4.-.-) (Preproteolysin) [Cleaved into: Survival-promoting peptide; DCD-1]                                                                                                                                                                                                                          | -0.10 | 9.52E-01 | Not Sig. | -0.34 | 7.81E-01 | Not Sig. |
| P18085 | ARF4    | ADP-ribosylation factor 4                                                                                                                                                                                                                                                                                          | -0.29 | 7.34E-01 | Not Sig. | -0.38 | 5.83E-01 | Not Sig. |
| P62805 | H4C1    | Histone H4                                                                                                                                                                                                                                                                                                         | -0.89 | 6.95E-01 | Not Sig. | 1.00  | 5.96E-01 | Not Sig. |
| P22234 | PAICS   | Multifunctional protein ADE2 [Includes: Phosphoribosylaminoimidazole-succinocarboxamide synthase (EC 6.3.2.6) (SAICAR synthetase); Phosphoribosylaminoimidazole carboxylase (EC 4.1.1.21) (AIR carboxylase) (AIRC)]                                                                                                | 0.36  | 6.33E-01 | Not Sig. | 0.05  | 9.71E-01 | Not Sig. |
| P37802 | TAGLN2  | Transgelin-2 (Epididymis tissue protein Li 7e) (SM22-alpha homolog)                                                                                                                                                                                                                                                | -0.80 | 8.90E-04 | Not Sig. | -0.48 | 6.03E-02 | Not Sig. |

|        |         |                                                                                                                                                                                                                                                                                                                                                                                                                                                                                                                    |       |          |          |       |          |          |
|--------|---------|--------------------------------------------------------------------------------------------------------------------------------------------------------------------------------------------------------------------------------------------------------------------------------------------------------------------------------------------------------------------------------------------------------------------------------------------------------------------------------------------------------------------|-------|----------|----------|-------|----------|----------|
| P84101 | SERF2   | Small EDRK-rich factor 2 (Gastric cancer-related protein VRG107) (Protein 4F5-related) (4F5rel) (h4F5rel)                                                                                                                                                                                                                                                                                                                                                                                                          | -0.49 | 7.88E-01 | Not Sig. | -0.03 | 9.84E-01 | Not Sig. |
| P53999 | SUB1    | Activated RNA polymerase II transcriptional coactivator p15 (Positive cofactor 4) (PC4) (SUB1 homolog) (p14)                                                                                                                                                                                                                                                                                                                                                                                                       | 0.48  | 7.05E-01 | Not Sig. | -0.39 | 7.33E-01 | Not Sig. |
| P12814 | ACTN1   | Alpha-actinin-1 (Alpha-actinin cytoskeletal isoform) (F-actin cross-linking protein) (Non-muscle alpha-actinin-1)                                                                                                                                                                                                                                                                                                                                                                                                  | 0.01  | 9.94E-01 | Not Sig. | -0.02 | 9.84E-01 | Not Sig. |
| Q13867 | BLMH    | Bleomycin hydrolase (BH) (BLM hydrolase) (BMH) (EC 3.4.22.40)                                                                                                                                                                                                                                                                                                                                                                                                                                                      | 0.75  | 3.78E-01 | Not Sig. | -0.45 | 6.01E-01 | Not Sig. |
| P63244 | RACK1   | Receptor of activated protein C kinase 1 (Cell proliferation-inducing gene 21 protein) (Guanine nucleotide-binding protein subunit beta-2-like 1) (Guanine nucleotide-binding protein subunit beta-like protein 12.3) (Human lung cancer oncogene 7 protein) (HLC-7) (Receptor for activated C kinase) (Small ribosomal subunit protein RACK1) [Cleaved into: Receptor of activated protein C kinase 1, N-terminally processed (Guanine nucleotide-binding protein subunit beta-2-like 1, N-terminally processed)] | 0.37  | 7.55E-02 | Not Sig. | 0.07  | 8.23E-01 | Not Sig. |
| P23284 | PP1B    | Peptidyl-prolyl cis-trans isomerase B (PPIase B) (EC 5.2.1.8) (CYP-S1) (Cyclophilin B) (Rotamase B) (S-cyclophilin) (SCYLP)                                                                                                                                                                                                                                                                                                                                                                                        | 0.37  | 3.15E-01 | Not Sig. | 0.45  | 1.49E-01 | Not Sig. |
| Q9NR12 | PDLIM7  | PDZ and LIM domain protein 7 (LIM mineralization protein) (LMP) (Protein enigma)                                                                                                                                                                                                                                                                                                                                                                                                                                   | -0.55 | 5.91E-01 | Not Sig. | -1.37 | 6.64E-02 | Not Sig. |
| Q14204 | DYNC1H1 | Cytoplasmic dynein 1 heavy chain 1 (Cytoplasmic dynein heavy chain 1) (Dynein heavy chain, cytosolic)                                                                                                                                                                                                                                                                                                                                                                                                              | 0.19  | 5.86E-01 | Not Sig. | 0.22  | 4.75E-01 | Not Sig. |
| P30041 | PRDX6   | Peroxiredoxin-6 (EC 1.11.1.27) (1-Cys peroxiredoxin) (1-Cys PRX) (24 kDa protein) (Acidic calcium-independent phospholipase A2) (aiPLA2) (EC 3.1.1.4) (Antioxidant protein 2) (Glutathione-dependent peroxiredoxin) (Liver 2D page spot 40) (Lysophosphatidylcholine acyltransferase 5) (LPCAT-5) (Lyso-PC acyltransferase 5) (EC 2.3.1.23) (Non-selenium glutathione peroxidase) (NSGPx) (Red blood cells page spot 12)                                                                                           | 0.21  | 6.44E-01 | Not Sig. | 0.23  | 5.40E-01 | Not Sig. |
| P30101 | PDIA3   | Protein disulfide-isomerase A3 (EC 5.3.4.1) (58 kDa glucose-regulated protein) (58 kDa microsomal protein) (p58) (Disulfide isomerase ER-60) (Endoplasmic reticulum resident protein 57) (ER protein 57) (ERp57) (Endoplasmic reticulum resident protein 60) (ER protein 60) (ERp60)                                                                                                                                                                                                                               | 0.26  | 4.89E-01 | Not Sig. | 0.41  | 1.56E-01 | Not Sig. |
| P45974 | USP5    | Ubiquitin carboxyl-terminal hydrolase 5 (EC 3.4.19.12) (Deubiquitinating enzyme 5) (Isopeptidase T) (Ubiquitin thioesterase 5) (Ubiquitin-specific-processing protease 5)                                                                                                                                                                                                                                                                                                                                          | -0.20 | 8.35E-01 | Not Sig. | -0.26 | 7.59E-01 | Not Sig. |
| P40939 | HADHA   | Trifunctional enzyme subunit alpha, mitochondrial (78 kDa gastrin-binding protein) (Monolysocardiolipin acyltransferase) (EC 2.3.1.-) (TP-alpha) [Includes: Long-chain enoyl-CoA hydratase (EC 4.2.1.17); Long chain 3-hydroxyacyl-CoA dehydrogenase (EC 1.1.1.211)]                                                                                                                                                                                                                                               | 0.38  | 2.83E-01 | Not Sig. | 0.11  | 8.14E-01 | Not Sig. |
| P08670 | VIM     | Vimentin                                                                                                                                                                                                                                                                                                                                                                                                                                                                                                           | -0.22 | 5.08E-01 | Not Sig. | 0.37  | 1.49E-01 | Not Sig. |
| Q9BY44 | EIF2A   | Eukaryotic translation initiation factor 2A (eIF-2A) (65 kDa eukaryotic translation initiation factor 2A) [Cleaved into: Eukaryotic translation initiation factor 2A, N-terminally processed]                                                                                                                                                                                                                                                                                                                      | -0.31 | 6.89E-01 | Not Sig. | 0.12  | 8.61E-01 | Not Sig. |
| P31689 | DNAJA1  | DnaJ homolog subfamily A member 1 (DnaJ protein)                                                                                                                                                                                                                                                                                                                                                                                                                                                                   | 0.12  | 9.30E-01 | Not Sig. | -0.03 | 9.84E-01 | Not Sig. |

|        |         |                                                                                                                                                                                                                                                                 |       |          |          |       |          |          |
|--------|---------|-----------------------------------------------------------------------------------------------------------------------------------------------------------------------------------------------------------------------------------------------------------------|-------|----------|----------|-------|----------|----------|
|        |         | homolog 2) (HSDJ) (Heat shock 40 kDa protein 4) (Heat shock protein J2) (HSJ-2) (Human Dnaj protein 2) (hdj-2)                                                                                                                                                  |       |          |          |       |          |          |
| Q9Y295 | DRG1    | Developmentally-regulated GTP-binding protein 1 (DRG-1) (Neural precursor cell expressed developmentally down-regulated protein 3) (NEDD-3) (Translation factor GTPase DRG1) (TRAFAC GTPase DRG1) (EC 3.6.5.-)                                                  | -0.82 | 6.29E-02 | Not Sig. | -0.44 | 4.26E-01 | Not Sig. |
| P35527 | KRT9    | Keratin, type I cytoskeletal 9 (Cytokeratin-9) (CK-9) (Keratin-9) (K9)                                                                                                                                                                                          | 0.68  | 2.24E-01 | Not Sig. | -0.17 | 8.17E-01 | Not Sig. |
| P46777 | RPL5    | 60S ribosomal protein L5 (Large ribosomal subunit protein uL18)                                                                                                                                                                                                 | 0.10  | 8.63E-01 | Not Sig. | 0.58  | 1.29E-01 | Not Sig. |
| P62249 | RPS16   | 40S ribosomal protein S16 (Small ribosomal subunit protein uS9)                                                                                                                                                                                                 | 0.11  | 7.97E-01 | Not Sig. | 0.05  | 9.27E-01 | Not Sig. |
| P62753 | RPS6    | 40S ribosomal protein S6 (Phosphoprotein NP33) (Small ribosomal subunit protein eS6)                                                                                                                                                                            | -0.16 | 7.88E-01 | Not Sig. | 0.51  | 1.92E-01 | Not Sig. |
| Q14764 | MVP     | Major vault protein (MVP) (Lung resistance-related protein)                                                                                                                                                                                                     | -0.61 | 3.32E-01 | Not Sig. | -0.90 | 8.89E-02 | Not Sig. |
| P16615 | ATP2A2  | Sarcoplasmic/endoplasmic reticulum calcium ATPase 2 (SERCA2) (SR Ca(2+)-ATPase 2) (EC 7.2.2.10) (Calcium pump 2) (Calcium-transporting ATPase sarcoplasmic reticulum type, slow twitch skeletal muscle isoform) (Endoplasmic reticulum class 1/2 Ca(2+) ATPase) | 0.23  | 7.34E-01 | Not Sig. | -0.17 | 7.84E-01 | Not Sig. |
| Q99829 | CPNE1   | Copine-1 (Chromobindin 17) (Copine I)                                                                                                                                                                                                                           | -0.41 | 5.65E-01 | Not Sig. | 0.18  | 8.18E-01 | Not Sig. |
| P13646 | KRT13   | Keratin, type I cytoskeletal 13 (Cytokeratin-13) (CK-13) (Keratin-13) (K13)                                                                                                                                                                                     | -0.31 | 9.18E-01 | Not Sig. | -0.11 | 9.80E-01 | Not Sig. |
| P00338 | LDHA    | L-lactate dehydrogenase A chain (LDH-A) (EC 1.1.1.27) (Cell proliferation-inducing gene 19 protein) (LDH muscle subunit) (LDH-M) (Renal carcinoma antigen NY-REN-59)                                                                                            | 0.34  | 1.48E-01 | Not Sig. | 0.36  | 1.03E-01 | Not Sig. |
| P61978 | HNRNPK  | Heterogeneous nuclear ribonucleoprotein K (hnRNP K) (Transformation up-regulated nuclear protein) (TUNP)                                                                                                                                                        | -0.32 | 4.15E-01 | Not Sig. | -0.24 | 5.35E-01 | Not Sig. |
| Q14498 | RBM39   | RNA-binding protein 39 (CAPER alpha) (CAPERalpha) (Hepatocellular carcinoma protein 1) (RNA-binding motif protein 39) (RNA-binding region-containing protein 2) (Splicing factor HCC1)                                                                          | 0.36  | 6.04E-01 | Not Sig. | 0.25  | 7.15E-01 | Not Sig. |
| P55060 | CSE1L   | Exportin-2 (Exp2) (Cellular apoptosis susceptibility protein) (Chromosome segregation 1-like protein) (Importin-alpha re-exporter)                                                                                                                              | 0.30  | 5.70E-01 | Not Sig. | 0.02  | 9.84E-01 | Not Sig. |
| O60506 | SYNCRIP | Heterogeneous nuclear ribonucleoprotein Q (hnRNP Q) (Glycine- and tyrosine-rich RNA-binding protein) (GRY-RBP) (NS1-associated protein 1) (Synaptotagmin-binding, cytoplasmic RNA-interacting protein)                                                          | -0.19 | 8.11E-01 | Not Sig. | 0.10  | 9.06E-01 | Not Sig. |
| P04040 | CAT     | Catalase (EC 1.11.1.6)                                                                                                                                                                                                                                          | 0.95  | 4.15E-01 | Not Sig. | -0.01 | 9.94E-01 | Not Sig. |
| Q92616 | GCN1    | eIF-2-alpha kinase activator GCN1 (GCN1 eIF-2-alpha kinase activator homolog) (GCN1-like protein 1) (General control of amino-acid synthesis 1-like protein 1) (Translational activator GCN1) (HsGCN1)                                                          | -0.38 | 5.31E-01 | Not Sig. | 0.09  | 9.10E-01 | Not Sig. |
| Q13546 | RIPK1   | Receptor-interacting serine/threonine-protein kinase 1 (EC 2.7.11.1) (Cell death protein RIP) (Receptor-interacting protein 1) (RIP-1)                                                                                                                          | -0.85 | 6.96E-02 | Not Sig. | -0.41 | 4.88E-01 | Not Sig. |
| P61160 | ACTR2   | Actin-related protein 2 (Actin-like protein 2)                                                                                                                                                                                                                  | 0.24  | 6.32E-01 | Not Sig. | -0.03 | 9.66E-01 | Not Sig. |
| Q00839 | HNRNPU  | Heterogeneous nuclear ribonucleoprotein U (hnRNP U) (GRIP120) (Nuclear p120 ribonucleoprotein) (Scaffold-attachment factor A) (SAF-A) (p120) (pp120)                                                                                                            | -0.05 | 9.52E-01 | Not Sig. | 0.30  | 4.94E-01 | Not Sig. |
| Q99623 | PHB2    | Prohibitin-2 (B-cell receptor-associated protein BAP37) (D-                                                                                                                                                                                                     | -0.62 | 1.69E-01 | Not Sig. | -0.75 | 8.25E-02 | Not Sig. |

|        |         |                                                                                                                                                                                                                                                                                                                                                                                                                                                                                                                                                                                                                                                                                              |       |          |          |       |          |          |
|--------|---------|----------------------------------------------------------------------------------------------------------------------------------------------------------------------------------------------------------------------------------------------------------------------------------------------------------------------------------------------------------------------------------------------------------------------------------------------------------------------------------------------------------------------------------------------------------------------------------------------------------------------------------------------------------------------------------------------|-------|----------|----------|-------|----------|----------|
|        |         | prohibitin) (Repressor of estrogen receptor activity)                                                                                                                                                                                                                                                                                                                                                                                                                                                                                                                                                                                                                                        |       |          |          |       |          |          |
| P06702 | S100A9  | Protein S100-A9 (Calgranulin-B) (Calprotectin L1H subunit) (Leukocyte L1 complex heavy chain) (Migration inhibitory factor-related protein 14) (MRP-14) (p14) (S100 calcium-binding protein A9)                                                                                                                                                                                                                                                                                                                                                                                                                                                                                              | -0.55 | 6.87E-01 | Not Sig. | -0.19 | 8.93E-01 | Not Sig. |
| P12004 | PCNA    | Proliferating cell nuclear antigen (PCNA) (Cyclin)                                                                                                                                                                                                                                                                                                                                                                                                                                                                                                                                                                                                                                           | -0.10 | 9.30E-01 | Not Sig. | -0.37 | 5.96E-01 | Not Sig. |
| P21980 | TGM2    | Protein-glutamine gamma-glutamyltransferase 2 (EC 2.3.2.13) (Erythrocyte transglutaminase) (Heart G alpha(h)) (hhG alpha(h)) (Isopeptidase TGM2) (EC 3.4.-.-) (Protein G alpha(h)) (G(h)) (Protein-glutamine deamidase TGM2) (EC 3.5.1.44) (Protein-glutamine dopaminytransferase TGM2) (EC 2.3.1.-) (Protein-glutamine histaminytransferase TGM2) (EC 2.3.1.-) (Protein-glutamine noradrenalinyltransferase TGM2) (EC 2.3.1.-) (Protein-glutamine serotonyltransferase TGM2) (EC 2.3.1.-) (Tissue transglutaminase) (tTG) (tTgase) (Transglutaminase C) (TG(C)) (TGC) (TGase C) (Transglutaminase H) (TGase H) (Transglutaminase II) (TGase II) (Transglutaminase-2) (TG2) (TGase-2) (hTG2) | 0.46  | 6.31E-01 | Not Sig. | 0.09  | 9.43E-01 | Not Sig. |
| Q92841 | DDX17   | Probable ATP-dependent RNA helicase DDX17 (EC 3.6.4.13) (DEAD box protein 17) (DEAD box protein p72) (DEAD box protein p82) (RNA-dependent helicase p72)                                                                                                                                                                                                                                                                                                                                                                                                                                                                                                                                     | 0.30  | 6.65E-01 | Not Sig. | -0.15 | 8.23E-01 | Not Sig. |
| P31944 | CASP14  | Caspase-14 (CASP-14) (EC 3.4.22.-) [Cleaved into: Caspase-14 subunit p17, mature form; Caspase-14 subunit p10, mature form; Caspase-14 subunit p20, intermediate form; Caspase-14 subunit p8, intermediate form]                                                                                                                                                                                                                                                                                                                                                                                                                                                                             | 0.84  | 6.04E-01 | Not Sig. | -0.88 | 5.35E-01 | Not Sig. |
| P55084 | HADHB   | Trifunctional enzyme subunit beta, mitochondrial (TP-beta) [Includes: 3-ketoacyl-CoA thiolase (EC 2.3.1.155) (EC 2.3.1.16) (Acetyl-CoA acyltransferase) (Beta-ketothiolase)]                                                                                                                                                                                                                                                                                                                                                                                                                                                                                                                 | 0.52  | 3.89E-01 | Not Sig. | -0.23 | 7.33E-01 | Not Sig. |
| Q9NZ18 | IGF2BP1 | Insulin-like growth factor 2 mRNA-binding protein 1 (IGF2 mRNA-binding protein 1) (IMP-1) (IMP1) (Coding region determinant-binding protein) (CRD-BP) (IGF-II mRNA-binding protein 1) (VICK2 family member 1) (Zipcode-binding protein 1) (ZBP-1)                                                                                                                                                                                                                                                                                                                                                                                                                                            | -0.07 | 9.52E-01 | Not Sig. | 0.26  | 7.31E-01 | Not Sig. |
| P62277 | RPS13   | 40S ribosomal protein S13 (Small ribosomal subunit protein uS15)                                                                                                                                                                                                                                                                                                                                                                                                                                                                                                                                                                                                                             | -0.09 | 9.51E-01 | Not Sig. | 0.49  | 5.12E-01 | Not Sig. |
| P35030 | PRSS3   | Trypsin-3 (EC 3.4.21.4) (Brain trypsinogen) (Mesotrypsin) (Mesotrypsinogen) (Serine protease 3) (Serine protease 4) (Trypsin III) (Trypsin IV)                                                                                                                                                                                                                                                                                                                                                                                                                                                                                                                                               | 0.00  | 9.94E-01 | Not Sig. | 0.10  | 7.99E-01 | Not Sig. |
| P18754 | RCC1    | Regulator of chromosome condensation (Cell cycle regulatory protein) (Chromosome condensation protein 1)                                                                                                                                                                                                                                                                                                                                                                                                                                                                                                                                                                                     | 0.07  | 9.27E-01 | Not Sig. | 0.22  | 6.39E-01 | Not Sig. |
| Q35Y84 | KRT71   | Keratin, type II cytoskeletal 71 (Cytokeratin-71) (CK-71) (Keratin-71) (K71) (Type II inner root sheath-specific keratin-K6irs1) (Keratin 6 irs) (hK6irs) (hK6irs1) (Type-II keratin Kb34)                                                                                                                                                                                                                                                                                                                                                                                                                                                                                                   | 0.01  | 9.90E-01 | Not Sig. | 0.41  | 5.49E-01 | Not Sig. |
| P48643 | CCT5    | T-complex protein 1 subunit epsilon (TCP-1-epsilon) (CCT-epsilon)                                                                                                                                                                                                                                                                                                                                                                                                                                                                                                                                                                                                                            | -0.05 | 9.30E-01 | Not Sig. | -0.01 | 9.84E-01 | Not Sig. |
| P35908 | KRT2    | Keratin, type II cytoskeletal 2 epidermal (Cytokeratin-2e) (CK-2e) (Epithelial keratin-2e) (Keratin-2 epidermis) (Keratin-2e) (K2e) (Type-II keratin Kb2)                                                                                                                                                                                                                                                                                                                                                                                                                                                                                                                                    | 0.49  | 6.31E-01 | Not Sig. | -0.56 | 5.19E-01 | Not Sig. |
| P05089 | ARG1    | Arginase-1 (EC 3.5.3.1) (Liver-type arginase) (Type I arginase)                                                                                                                                                                                                                                                                                                                                                                                                                                                                                                                                                                                                                              | 0.96  | 2.48E-01 | Not Sig. | -0.69 | 4.32E-01 | Not Sig. |

|        |          |                                                                                                                                                                                                                                                                                                                                                                                                              |       |          |          |       |          |          |
|--------|----------|--------------------------------------------------------------------------------------------------------------------------------------------------------------------------------------------------------------------------------------------------------------------------------------------------------------------------------------------------------------------------------------------------------------|-------|----------|----------|-------|----------|----------|
| P36952 | SERPINB5 | Serpin B5 (Maspin) (Peptidase inhibitor 5) (PI-5)                                                                                                                                                                                                                                                                                                                                                            | 0.24  | 7.64E-01 | Not Sig. | -0.14 | 8.53E-01 | Not Sig. |
| P38919 | EIF4A3   | Eukaryotic initiation factor 4A-III (eIF-4A-III) (eIF4A-III) (EC 3.6.4.13) (ATP-dependent RNA helicase DDX48) (ATP-dependent RNA helicase eIF4A-3) (DEAD box protein 48) (Eukaryotic initiation factor 4A-like NUK-34) (Eukaryotic translation initiation factor 4A isoform 3) (Nuclear matrix protein 265) (NMP 265) (hNMP 265) [Cleaved into: Eukaryotic initiation factor 4A-III, N-terminally processed] | -0.10 | 9.30E-01 | Not Sig. | 0.24  | 7.86E-01 | Not Sig. |
| Q15084 | PDIA6    | Protein disulfide-isomerase A6 (EC 5.3.4.1) (Endoplasmic reticulum protein 5) (ER protein 5) (ERp5) (Protein disulfide isomerase P5) (Thioredoxin domain-containing protein 7)                                                                                                                                                                                                                               | 0.29  | 6.32E-01 | Not Sig. | 0.01  | 9.86E-01 | Not Sig. |
| P17844 | DDX5     | Probable ATP-dependent RNA helicase DDX5 (EC 3.6.4.13) (DEAD box protein 5) (RNA helicase p68)                                                                                                                                                                                                                                                                                                               | 0.06  | 8.74E-01 | Not Sig. | -0.08 | 8.14E-01 | Not Sig. |
| P26599 | PTBP1    | Polyrimidine tract-binding protein 1 (PTB) (57 kDa RNA-binding protein PPTB-1) (Heterogeneous nuclear ribonucleoprotein I) (hnRNP I)                                                                                                                                                                                                                                                                         | -0.12 | 7.97E-01 | Not Sig. | -0.03 | 9.71E-01 | Not Sig. |
| P62280 | RPS11    | 40S ribosomal protein S11 (Small ribosomal subunit protein uS17)                                                                                                                                                                                                                                                                                                                                             | -0.48 | 4.77E-01 | Not Sig. | 0.11  | 8.89E-01 | Not Sig. |
| P47756 | CAPZB    | F-actin-capping protein subunit beta (CapZ beta)                                                                                                                                                                                                                                                                                                                                                             | 0.40  | 3.78E-01 | Not Sig. | -0.20 | 6.77E-01 | Not Sig. |
| O75083 | WDR1     | WD repeat-containing protein 1 (Actin-interacting protein 1) (AIP1) (NORI-1)                                                                                                                                                                                                                                                                                                                                 | -0.23 | 6.31E-01 | Not Sig. | -0.02 | 9.84E-01 | Not Sig. |
| P26373 | RPL13    | 60S ribosomal protein L13 (Breast basic conserved protein 1) (Large ribosomal subunit protein eL13)                                                                                                                                                                                                                                                                                                          | 0.07  | 8.63E-01 | Not Sig. | 0.12  | 7.33E-01 | Not Sig. |
| P60660 | MYL6     | Myosin light polypeptide 6 (17 kDa myosin light chain) (LC17) (Myosin light chain 3) (MLC-3) (Myosin light chain alkali 3) (Myosin light chain A3) (Smooth muscle and nonmuscle myosin light chain alkali 6)                                                                                                                                                                                                 | -0.33 | 7.43E-01 | Not Sig. | -0.29 | 7.46E-01 | Not Sig. |
| Q8NC51 | SERBP1   | Plasminogen activator inhibitor 1 RNA-binding protein (PAI1 RNA-binding protein 1) (PAI-RBP1) (SERPINE1 mRNA-binding protein 1)                                                                                                                                                                                                                                                                              | -0.26 | 7.63E-01 | Not Sig. | -0.40 | 5.73E-01 | Not Sig. |
| O43707 | ACTN4    | Alpha-actinin-4 (Non-muscle alpha-actinin 4)                                                                                                                                                                                                                                                                                                                                                                 | 0.15  | 8.63E-01 | Not Sig. | 0.71  | 1.57E-01 | Not Sig. |
| Q14008 | CKAP5    | Cytoskeleton-associated protein 5 (Colonic and hepatic tumor overexpressed gene protein) (Ch-TOG)                                                                                                                                                                                                                                                                                                            | -0.11 | 8.66E-01 | Not Sig. | 0.01  | 9.84E-01 | Not Sig. |
| P11308 | ERG      | Transcriptional regulator ERG (Transforming protein ERG)                                                                                                                                                                                                                                                                                                                                                     | 0.23  | 8.63E-01 | Not Sig. | 0.31  | 7.96E-01 | Not Sig. |
| P49321 | NASP     | Nuclear autoantigenic sperm protein (NASP)                                                                                                                                                                                                                                                                                                                                                                   | 0.16  | 8.19E-01 | Not Sig. | -0.12 | 8.55E-01 | Not Sig. |
| P27708 | CAD      | CAD protein [Includes: Glutamine-dependent carbamoyl-phosphate synthase (EC 6.3.5.5); Aspartate carbamoyltransferase (EC 2.1.3.2); Dihydroorotase (EC 3.5.2.3)]                                                                                                                                                                                                                                              | 0.71  | 1.20E-01 | Not Sig. | -0.16 | 8.05E-01 | Not Sig. |
| Q04637 | EIF4G1   | Eukaryotic translation initiation factor 4 gamma 1 (eIF-4-gamma 1) (eIF-4G 1) (eIF-4G1) (p220)                                                                                                                                                                                                                                                                                                               | 0.04  | 9.60E-01 | Not Sig. | 0.13  | 7.84E-01 | Not Sig. |
| P62701 | RPS4X    | 40S ribosomal protein S4, X isoform (SCR10) (Single copy abundant mRNA protein) (Small ribosomal subunit protein eS4)                                                                                                                                                                                                                                                                                        | 0.16  | 6.70E-01 | Not Sig. | -0.03 | 9.58E-01 | Not Sig. |
| Q99798 | ACO2     | Aconitate hydratase, mitochondrial (Aconitase) (EC 4.2.1.3) (Citrate hydro-lyase)                                                                                                                                                                                                                                                                                                                            | 0.16  | 8.41E-01 | Not Sig. | 0.30  | 6.43E-01 | Not Sig. |
| Q13151 | HNRNPA0  | Heterogeneous nuclear ribonucleoprotein A0 (hnRNP A0)                                                                                                                                                                                                                                                                                                                                                        | 0.32  | 4.50E-01 | Not Sig. | 0.48  | 1.49E-01 | Not Sig. |
| P63241 | EIF5A    | Eukaryotic translation initiation factor 5A-1 (eIF-5A-1) (eIF-5A1) (Eukaryotic initiation factor 5A isoform 1) (eIF-5A) (Rev-binding factor) (eIF-4D)                                                                                                                                                                                                                                                        | 0.33  | 2.31E-01 | Not Sig. | 0.35  | 1.49E-01 | Not Sig. |
| P46940 | IQGAP1   | Ras GTPase-activating-like protein IQGAP1 (p195)                                                                                                                                                                                                                                                                                                                                                             | -0.43 | 5.61E-01 | Not Sig. | 0.32  | 6.62E-01 | Not Sig. |
| P51991 | HNRNPA3  | Heterogeneous nuclear ribonucleoprotein A3 (hnRNP A3)                                                                                                                                                                                                                                                                                                                                                        | -0.09 | 8.90E-01 | Not Sig. | 0.14  | 7.84E-01 | Not Sig. |

|        |           |                                                                                                                                                                                                                                                   |       |          |          |       |          |          |
|--------|-----------|---------------------------------------------------------------------------------------------------------------------------------------------------------------------------------------------------------------------------------------------------|-------|----------|----------|-------|----------|----------|
| Q9Y3U8 | RPL36     | 60S ribosomal protein L36 (Large ribosomal subunit protein eL36)                                                                                                                                                                                  | -0.23 | 6.87E-01 | Not Sig. | -0.03 | 9.71E-01 | Not Sig. |
| P22626 | HNRNPA2B1 | Heterogeneous nuclear ribonucleoproteins A2/B1 (hnRNP A2/B1)                                                                                                                                                                                      | 0.06  | 9.60E-01 | Not Sig. | 0.37  | 5.91E-01 | Not Sig. |
| P62857 | RPS28     | 40S ribosomal protein S28 (Small ribosomal subunit protein eS28)                                                                                                                                                                                  | -0.12 | 9.09E-01 | Not Sig. | 0.00  | 9.96E-01 | Not Sig. |
| P32119 | PRDX2     | Peroxiredoxin-2 (EC 1.11.1.24) (Natural killer cell-enhancing factor B) (NKEF-B) (PRP) (Thiol-specific antioxidant protein) (TSA) (Thioredoxin peroxidase 1) (Thioredoxin-dependent peroxide reductase 1) (Thioredoxin-dependent peroxiredoxin 2) | 0.82  | 4.15E-01 | Not Sig. | -0.41 | 7.15E-01 | Not Sig. |
| P62937 | PPIA      | Peptidyl-prolyl cis-trans isomerase A (PPIase A) (EC 5.2.1.8) (Cyclophilin A) (Cyclosporin A-binding protein) (Rotamase A) [Cleaved into: Peptidyl-prolyl cis-trans isomerase A, N-terminally processed]                                          | 0.25  | 4.77E-01 | Not Sig. | 0.45  | 9.10E-02 | Not Sig. |
| P61927 | RPL37     | 60S ribosomal protein L37 (G1.16) (Large ribosomal subunit protein eL37)                                                                                                                                                                          | -0.17 | 8.92E-01 | Not Sig. | 0.03  | 9.84E-01 | Not Sig. |
| O75534 | CSDE1     | Cold shock domain-containing protein E1 (N-ras upstream gene protein) (Protein UNR)                                                                                                                                                               | -0.67 | 2.25E-01 | Not Sig. | -0.83 | 8.89E-02 | Not Sig. |
| Q9HB71 | CACYBP    | Calcyclin-binding protein (CacyBP) (hCacyBP) (S100A6-binding protein) (Siah-interacting protein)                                                                                                                                                  | -0.60 | 1.17E-02 | Not Sig. | -0.97 | 1.87E-04 | Not Sig. |
| P49915 | GMPS      | GMP synthase [glutamine-hydrolyzing] (EC 6.3.5.2) (GMP synthetase) (Glutamine amidotransferase)                                                                                                                                                   | -0.02 | 9.86E-01 | Not Sig. | -0.20 | 7.41E-01 | Not Sig. |
| Q14980 | NUMA1     | Nuclear mitotic apparatus protein 1 (Nuclear matrix protein-22) (NMP-22) (Nuclear mitotic apparatus protein) (NuMA protein) (SP-H antigen)                                                                                                        | -0.58 | 4.96E-01 | Not Sig. | 0.71  | 3.65E-01 | Not Sig. |
| Q01469 | FABP5     | Fatty acid-binding protein 5 (Epidermal-type fatty acid-binding protein) (E-FABP) (Fatty acid-binding protein, epidermal) (Psoriasis-associated fatty acid-binding protein homolog) (PA-FABP)                                                     | 0.13  | 9.52E-01 | Not Sig. | -0.26 | 8.55E-01 | Not Sig. |
| Q5D862 | FLG2      | Filaggrin-2 (FLG-2) (Intermediate filament-associated and psoriasis-susceptibility protein) (Ifapsoiasin)                                                                                                                                         | 0.34  | 7.43E-01 | Not Sig. | -1.16 | 8.89E-02 | Not Sig. |
| P46781 | RPS9      | 40S ribosomal protein S9 (Small ribosomal subunit protein uS4)                                                                                                                                                                                    | 0.23  | 4.78E-01 | Not Sig. | 0.24  | 4.18E-01 | Not Sig. |
| P26368 | U2AF2     | Splicing factor U2AF 65 kDa subunit (U2 auxiliary factor 65 kDa subunit) (hU2AF(65)) (U2 snRNP auxiliary factor large subunit)                                                                                                                    | -0.26 | 7.62E-01 | Not Sig. | 0.74  | 1.92E-01 | Not Sig. |
| Q00341 | HDLBP     | Vigilin (High density lipoprotein-binding protein) (HDL-binding protein)                                                                                                                                                                          | -0.10 | 9.03E-01 | Not Sig. | 0.39  | 4.34E-01 | Not Sig. |
| P04075 | ALDOA     | Fructose-bisphosphate aldolase A (EC 4.1.2.13) (Lung cancer antigen NY-LU-1) (Muscle-type aldolase)                                                                                                                                               | 0.00  | 9.94E-01 | Not Sig. | -0.52 | 2.15E-01 | Not Sig. |
| P15311 | EZR       | Ezrin (Cytovillin) (Villin-2) (p81)                                                                                                                                                                                                               | -0.45 | 3.55E-01 | Not Sig. | 0.49  | 2.31E-01 | Not Sig. |
| Q03181 | PPARD     | Peroxisome proliferator-activated receptor delta (PPAR-delta) (NUC1) (Nuclear hormone receptor 1) (NUC1) (Nuclear receptor subfamily 1 group C member 2) (Peroxisome proliferator-activated receptor beta) (PPAR-beta)                            | -0.47 | 7.34E-01 | Not Sig. | 0.04  | 9.84E-01 | Not Sig. |
| Q01813 | PFKP      | ATP-dependent 6-phosphofructokinase, platelet type (ATP-PFK) (PFK-P) (EC 2.7.1.11) (6-phosphofructokinase type C) (Phosphofructo-1-kinase isozyme C) (PFK-C) (Phosphohexokinase)                                                                  | -0.10 | 8.63E-01 | Not Sig. | 0.17  | 7.41E-01 | Not Sig. |
| P08243 | ASNS      | Asparagine synthetase [glutamine-hydrolyzing] (EC 6.3.5.4) (Cell cycle control protein TS11) (Glutamine-dependent asparagine synthetase)                                                                                                          | -0.55 | 5.52E-01 | Not Sig. | -0.59 | 4.83E-01 | Not Sig. |
| Q02413 | DSG1      | Desmoglein-1 (Cadherin family member 4) (Desmosomal glycoprotein 1) (DG1) (DGI) (Pemphigus foliaceus antigen)                                                                                                                                     | 0.83  | 3.15E-01 | Not Sig. | -0.40 | 6.77E-01 | Not Sig. |

|         |           |                                                                                                                                                                                                                                                                                                                                                                      |       |          |          |       |          |          |
|---------|-----------|----------------------------------------------------------------------------------------------------------------------------------------------------------------------------------------------------------------------------------------------------------------------------------------------------------------------------------------------------------------------|-------|----------|----------|-------|----------|----------|
| P55072  | VCP       | Transitional endoplasmic reticulum ATPase (TER ATPase) (EC 3.6.4.6) (15S Mg(2+)-ATPase p97 subunit) (Valosin-containing protein) (VCP)                                                                                                                                                                                                                               | -0.94 | 8.56E-02 | Not Sig. | 0.43  | 5.35E-01 | Not Sig. |
| Q8I2H2  | XRN1      | 5'-3' exoribonuclease 1 (EC 3.1.13.-) (Strand-exchange protein 1 homolog)                                                                                                                                                                                                                                                                                            | -0.77 | 5.01E-02 | Not Sig. | -0.59 | 1.52E-01 | Not Sig. |
| P20930  | FLG       | Filaggrin                                                                                                                                                                                                                                                                                                                                                            | 0.94  | 3.13E-01 | Not Sig. | -0.07 | 9.71E-01 | Not Sig. |
| P46778  | RPL21     | 60S ribosomal protein L21 (Large ribosomal subunit protein eL21)                                                                                                                                                                                                                                                                                                     | 0.46  | 5.81E-01 | Not Sig. | -0.31 | 7.15E-01 | Not Sig. |
| Q13200  | PSMD2     | 26S proteasome non-ATPase regulatory subunit 2 (26S proteasome regulatory subunit RPN1) (26S proteasome regulatory subunit S2) (26S proteasome subunit p97) (Protein 55.11) (Tumor necrosis factor type 1 receptor-associated protein 2)                                                                                                                             | -0.22 | 7.05E-01 | Not Sig. | 0.13  | 8.23E-01 | Not Sig. |
| O15427  | SLC16A3   | Monocarboxylate transporter 4 (MCT 4) (Solute carrier family 16 member 3)                                                                                                                                                                                                                                                                                            | 0.51  | 3.04E-01 | Not Sig. | 0.21  | 7.15E-01 | Not Sig. |
| Q08378  | GOLGA3    | Golgin subfamily A member 3 (Golgi complex-associated protein of 170 kDa) (GCP170) (Golgin-160)                                                                                                                                                                                                                                                                      | -0.53 | 4.15E-01 | Not Sig. | 0.09  | 9.14E-01 | Not Sig. |
| P18621  | RPL17     | 60S ribosomal protein L17 (60S ribosomal protein L23) (Large ribosomal subunit protein uL22) (PD-1)                                                                                                                                                                                                                                                                  | 0.15  | 8.63E-01 | Not Sig. | -0.29 | 6.69E-01 | Not Sig. |
| Q6P2Q9  | PRPF8     | Pre-mRNA-processing-splicing factor 8 (220 kDa US snRNP-specific protein) (PRP8 homolog) (Splicing factor Prp8) (p220)                                                                                                                                                                                                                                               | -0.41 | 5.03E-01 | Not Sig. | -0.23 | 7.24E-01 | Not Sig. |
| P11586  | MTHFD1    | C-1-tetrahydrofolate synthase, cytoplasmic (C1-THF synthase) (Epididymis secretory sperm binding protein) [Cleaved into: C-1-tetrahydrofolate synthase, cytoplasmic, N-terminally processed] [Includes: Methylenetetrahydrofolate dehydrogenase (EC 1.5.1.5); Methylenetetrahydrofolate cyclohydrolase (EC 3.5.4.9); Formyltetrahydrofolate synthetase (EC 6.3.4.3)] | 0.60  | 2.75E-02 | Not Sig. | 0.21  | 5.49E-01 | Not Sig. |
| Q6I850  | TWF2      | Twinfilin-2 (A6-related protein) (hA6RP) (Protein tyrosine kinase 9-like) (Twinfilin-1-like protein)                                                                                                                                                                                                                                                                 | -0.41 | 7.09E-01 | Not Sig. | -0.66 | 4.78E-01 | Not Sig. |
| O43143  | DHX15     | Pre-mRNA-splicing factor ATP-dependent RNA helicase DHX15 (EC 3.6.4.13) (ATP-dependent RNA helicase #46) (DEAH box protein 15)                                                                                                                                                                                                                                       | 0.24  | 7.54E-01 | Not Sig. | 0.14  | 8.50E-01 | Not Sig. |
| Q8WU M4 | PDCD6IP   | Programmed cell death 6-interacting protein (PDCD6-interacting protein) (ALG-2-interacting protein 1) (ALG-2-interacting protein X) (Hp95)                                                                                                                                                                                                                           | 0.07  | 9.30E-01 | Not Sig. | 0.42  | 3.95E-01 | Not Sig. |
| P42357  | HAL       | Histidine ammonia-lyase (Histidase) (EC 4.3.1.3)                                                                                                                                                                                                                                                                                                                     | 0.60  | 6.65E-01 | Not Sig. | -0.84 | 4.69E-01 | Not Sig. |
| Q16658  | FSCN1     | Fascin (55 kDa actin-binding protein) (Singed-like protein) (p55)                                                                                                                                                                                                                                                                                                    | 0.35  | 3.13E-01 | Not Sig. | 0.17  | 6.58E-01 | Not Sig. |
| Q9P2J5  | LARS1     | Leucine-tRNA ligase, cytoplasmic (EC 6.1.1.4) (Leucyl-tRNA synthetase) (LeuRS)                                                                                                                                                                                                                                                                                       | -0.48 | 4.50E-01 | Not Sig. | -0.13 | 8.53E-01 | Not Sig. |
| O00159  | MYO1C     | Unconventional myosin-1c (Myosin I beta) (MMI-beta) (MMIb)                                                                                                                                                                                                                                                                                                           | 0.39  | 3.13E-01 | Not Sig. | -0.04 | 9.58E-01 | Not Sig. |
| Q8WW M7 | ATXN2L    | Ataxin-2-like protein (Ataxin-2 domain protein) (Ataxin-2-related protein)                                                                                                                                                                                                                                                                                           | 0.31  | 7.43E-01 | Not Sig. | 0.44  | 5.49E-01 | Not Sig. |
| Q14103  | HNRNPD    | Heterogeneous nuclear ribonucleoprotein D0 (hnRNP D0) (AU-rich element RNA-binding protein 1)                                                                                                                                                                                                                                                                        | -0.05 | 9.52E-01 | Not Sig. | 0.25  | 6.36E-01 | Not Sig. |
| Q00325  | SLC25A3   | Phosphate carrier protein, mitochondrial (Phosphate transport protein) (PTP) (Solute carrier family 25 member 3)                                                                                                                                                                                                                                                     | 0.23  | 6.31E-01 | Not Sig. | -0.04 | 9.50E-01 | Not Sig. |
| Q6UWP 8 | SBSN      | Suprabasin                                                                                                                                                                                                                                                                                                                                                           | 0.10  | 9.30E-01 | Not Sig. | -0.55 | 4.04E-01 | Not Sig. |
| P07195  | LDHB      | L-lactate dehydrogenase B chain (LDH-B) (EC 1.1.1.27) (LDH heart subunit) (LDH-H) (Renal carcinoma antigen NY-REN-46)                                                                                                                                                                                                                                                | 0.20  | 6.44E-01 | Not Sig. | 0.24  | 5.17E-01 | Not Sig. |
| P35237  | SERPINF 6 | Serpin B6 (Cytoplasmic antiprotease) (CAP) (Peptidase inhibitor 6) (PI-6) (Placental thrombin inhibitor)                                                                                                                                                                                                                                                             | -0.01 | 9.90E-01 | Not Sig. | 0.02  | 9.84E-01 | Not Sig. |



|        |         |                                                                                                                                                                                                                                                                                                                                                        |       |          |          |       |          |          |
|--------|---------|--------------------------------------------------------------------------------------------------------------------------------------------------------------------------------------------------------------------------------------------------------------------------------------------------------------------------------------------------------|-------|----------|----------|-------|----------|----------|
| P32969 | RPL9    | 60S ribosomal protein L9 (Large ribosomal subunit protein uL6)                                                                                                                                                                                                                                                                                         | -0.20 | 8.09E-01 | Not Sig. | -0.37 | 5.60E-01 | Not Sig. |
| P41252 | IARS1   | Isoleucine-tRNA ligase, cytoplasmic (EC 6.1.1.5) (Isoleucyl-tRNA synthetase) (IRS) (IleRS)                                                                                                                                                                                                                                                             | 0.11  | 9.30E-01 | Not Sig. | 0.06  | 9.66E-01 | Not Sig. |
| O75342 | ALOX12B | Arachidonate 12-lipoxygenase, 12R-type (12R-LOX) (12R-lipoxygenase) (EC 1.13.11.-) (Epidermis-type lipoxygenase 12)                                                                                                                                                                                                                                    | 0.01  | 9.94E-01 | Not Sig. | -0.31 | 7.73E-01 | Not Sig. |
| P61158 | ACTR3   | Actin-related protein 3 (Actin-like protein 3)                                                                                                                                                                                                                                                                                                         | -0.27 | 7.34E-01 | Not Sig. | 0.07  | 9.48E-01 | Not Sig. |
| P27635 | RPL10   | 60S ribosomal protein L10 (Laminin receptor homolog) (Large ribosomal subunit protein uL16) (Protein QM) (Ribosomal protein L10) (Tumor suppressor QM)                                                                                                                                                                                                 | -0.58 | 1.97E-02 | Not Sig. | -0.43 | 1.05E-01 | Not Sig. |
| P62826 | RAN     | GTP-binding nuclear protein Ran (Androgen receptor-associated protein 24) (GTPase Ran) (Ras-like protein TC4) (Ras-related nuclear protein)                                                                                                                                                                                                            | 0.32  | 3.68E-01 | Not Sig. | 0.22  | 5.32E-01 | Not Sig. |
| P01857 | IGHG1   | Immunoglobulin heavy constant gamma 1 (Ig gamma-1 chain C region) (Ig gamma-1 chain C region EU) (Ig gamma-1 chain C region KOL) (Ig gamma-1 chain C region NIE)                                                                                                                                                                                       | 0.31  | 8.25E-01 | Not Sig. | 0.51  | 6.77E-01 | Not Sig. |
| Q9UBC9 | SPRR3   | Small proline-rich protein 3 (22 kDa pancornulin) (Cornifin beta) (Esophagin)                                                                                                                                                                                                                                                                          | -0.37 | 8.30E-01 | Not Sig. | 0.78  | 5.49E-01 | Not Sig. |
| P30044 | PRDX5   | Peroxiredoxin-5, mitochondrial (EC 1.11.1.24) (Alu corepressor 1) (Antioxidant enzyme B166) (AOEB166) (Liver tissue 2D-page spot 71B) (PLP) (Peroxiredoxin V) (Prx-V) (Peroxisomal antioxidant enzyme) (TPx type VI) (Thioredoxin peroxidase PMP20) (Thioredoxin-dependent peroxidase 5)                                                               | -0.51 | 3.85E-01 | Not Sig. | -0.23 | 7.31E-01 | Not Sig. |
| P52907 | CAPZA1  | F-actin-capping protein subunit alpha-1 (CapZ alpha-1)                                                                                                                                                                                                                                                                                                 | -0.19 | 7.97E-01 | Not Sig. | -0.14 | 8.32E-01 | Not Sig. |
| P06576 | ATP5F1B | ATP synthase subunit beta, mitochondrial (EC 7.1.2.2) (ATP synthase F1 subunit beta)                                                                                                                                                                                                                                                                   | -0.40 | 7.64E-01 | Not Sig. | 0.29  | 8.23E-01 | Not Sig. |
| P17812 | CTPS1   | CTP synthase 1 (EC 6.3.4.2) (CTP synthetase 1) (UTP--ammonia ligase 1)                                                                                                                                                                                                                                                                                 | 0.12  | 8.11E-01 | Not Sig. | 0.22  | 6.31E-01 | Not Sig. |
| P62861 | FAU     | 40S ribosomal protein S30 (Small ribosomal subunit protein eS30)                                                                                                                                                                                                                                                                                       | -0.18 | 8.63E-01 | Not Sig. | 1.09  | 7.45E-02 | Not Sig. |
| O96008 | TOMM40  | Mitochondrial import receptor subunit TOM40 homolog (Protein Haymaker) (Translocase of outer membrane 40 kDa subunit homolog) (p38.5)                                                                                                                                                                                                                  | -0.02 | 9.89E-01 | Not Sig. | 0.14  | 8.53E-01 | Not Sig. |
| P50395 | GDI2    | Rab GDP dissociation inhibitor beta (Rab GDI beta) (Guanosine diphosphate dissociation inhibitor 2) (GDI-2)                                                                                                                                                                                                                                            | -0.19 | 8.03E-01 | Not Sig. | 0.22  | 7.33E-01 | Not Sig. |
| P12273 | PIP     | Prolactin-inducible protein (Gross cystic disease fluid protein 15) (GDFP-15) (Prolactin-induced protein) (Secretory actin-binding protein) (SABP) (gp17)                                                                                                                                                                                              | 0.08  | 9.60E-01 | Not Sig. | -0.26 | 8.23E-01 | Not Sig. |
| P58546 | MTPN    | Myotrophin (Protein V-1)                                                                                                                                                                                                                                                                                                                               | -0.11 | 8.63E-01 | Not Sig. | -0.73 | 8.25E-02 | Not Sig. |
| Q08J23 | NSUN2   | RNA cytosine C(5)-methyltransferase NSUN2 (EC 2.1.1.-) (Myc-induced SUN domain-containing protein) (Misu) (NOL1/NOP2/Sun domain family member 2) (Substrate of AIM1/Aurora kinase B) (mRNA cytosine C(5)-methyltransferase) (EC 2.1.1.-) (tRNA cytosine C(5)-methyltransferase) (EC 2.1.1.-) (EC 2.1.1.203) (tRNA methyltransferase 4 homolog) (hTrm4) | -0.13 | 8.63E-01 | Not Sig. | -0.38 | 5.06E-01 | Not Sig. |
| Q9P2K5 | MYEF2   | Myelin expression factor 2 (MEF-2) (MyEF-2) (MST156)                                                                                                                                                                                                                                                                                                   | -0.10 | 9.30E-01 | Not Sig. | 0.49  | 4.85E-01 | Not Sig. |
| Q8NE71 | ABCF1   | ATP-binding cassette subfamily F member 1 (ATP-binding cassette 50) (TNF-alpha-stimulated ABC protein)                                                                                                                                                                                                                                                 | 0.30  | 7.63E-01 | Not Sig. | -0.34 | 7.15E-01 | Not Sig. |
| P40926 | MDH2    | Malate dehydrogenase, mitochondrial (EC 1.1.1.37)                                                                                                                                                                                                                                                                                                      | -0.03 | 9.86E-01 | Not Sig. | 0.09  | 9.31E-01 | Not Sig. |
| Q07020 | RPL18   | 60S ribosomal protein L18 (Large ribosomal subunit protein eL18)                                                                                                                                                                                                                                                                                       | -0.06 | 9.44E-01 | Not Sig. | 0.21  | 6.77E-01 | Not Sig. |
| P43243 | MATR3   | Matrin-3                                                                                                                                                                                                                                                                                                                                               | -0.14 | 8.63E-01 | Not Sig. | 0.10  | 9.06E-01 | Not Sig. |

|         |         |                                                                                                                                                                                                                                                                                   |       |          |          |       |          |          |
|---------|---------|-----------------------------------------------------------------------------------------------------------------------------------------------------------------------------------------------------------------------------------------------------------------------------------|-------|----------|----------|-------|----------|----------|
| Q8NFW1  | COL22A1 | Collagen alpha-1(XII) chain                                                                                                                                                                                                                                                       | -0.58 | 6.65E-01 | Not Sig. | 0.03  | 9.84E-01 | Not Sig. |
| Q14157  | UBAP2L  | Ubiquitin-associated protein 2-like (Protein NICE-4)                                                                                                                                                                                                                              | -0.45 | 4.47E-01 | Not Sig. | -0.60 | 1.99E-01 | Not Sig. |
| P45880  | VDAC2   | Voltage-dependent anion-selective channel protein 2 (VDAC-2) (hVDAC2) (Outer mitochondrial membrane protein porin 2)                                                                                                                                                              | 0.02  | 9.72E-01 | Not Sig. | 0.09  | 7.96E-01 | Not Sig. |
| P62495  | ETF1    | Eukaryotic peptide chain release factor subunit 1 (Eukaryotic release factor 1) (eRF1) (Protein C11) (TB3-1)                                                                                                                                                                      | -0.18 | 8.63E-01 | Not Sig. | 0.74  | 3.36E-01 | Not Sig. |
| Q9NTK5  | OLA1    | Obg-like ATPase 1 (DNA damage-regulated overexpressed in cancer 45) (DOC45) (GTP-binding protein 9)                                                                                                                                                                               | -0.14 | 9.30E-01 | Not Sig. | -0.42 | 6.77E-01 | Not Sig. |
| Q9NZ08  | ERAP1   | Endoplasmic reticulum aminopeptidase 1 (EC 3.4.11.-) (ARTS-1) (Adipocyte-derived leucine aminopeptidase) (A-LAP) (Aminopeptidase PILS) (Puromycin-insensitive leucyl-specific aminopeptidase) (PILS-AP) (Type 1 tumor necrosis factor receptor shedding aminopeptidase regulator) | 0.01  | 9.90E-01 | Not Sig. | -0.03 | 9.84E-01 | Not Sig. |
| O00299  | CLIC1   | Chloride intracellular channel protein 1 (Chloride channel ABP) (Nuclear chloride ion channel 27) (NCC27) (Regulatory nuclear chloride ion channel protein) (hRNCC)                                                                                                               | 0.24  | 5.70E-01 | Not Sig. | 0.17  | 6.99E-01 | Not Sig. |
| Q8WU H6 | TMEM263 | Transmembrane protein 263                                                                                                                                                                                                                                                         | 0.16  | 8.20E-01 | Not Sig. | 0.16  | 8.17E-01 | Not Sig. |
| P62273  | RPS29   | 40S ribosomal protein S29 (Small ribosomal subunit protein uS14)                                                                                                                                                                                                                  | -0.21 | 8.63E-01 | Not Sig. | 0.67  | 4.88E-01 | Not Sig. |
| P28838  | LAP3    | Cytosol aminopeptidase (EC 3.4.11.1) (Cysteinyglycine-S-conjugate dipeptidase) (EC 3.4.13.23) (Leucine aminopeptidase 3) (LAP-3) (Leucyl aminopeptidase) (Peptidase S) (Proline aminopeptidase) (EC 3.4.11.5) (Prolyl aminopeptidase)                                             | -0.27 | 8.11E-01 | Not Sig. | 0.75  | 3.93E-01 | Not Sig. |
| P22087  | FBL     | rRNA 2'-O-methyltransferase fibrillar (EC 2.1.1.-) (34 kDa nucleolar scleroderma antigen) (Histone-glutamine methyltransferase) (U6 snRNA 2'-O-methyltransferase fibrillar)                                                                                                       | 0.04  | 9.69E-01 | Not Sig. | 0.48  | 4.18E-01 | Not Sig. |
| Q9Y310  | RTCB    | RNA-splicing ligase RtcB homolog (EC 6.5.1.8) (3'-phosphate/5'-hydroxy nucleic acid ligase)                                                                                                                                                                                       | -0.86 | 4.20E-02 | Not Sig. | -0.15 | 8.14E-01 | Not Sig. |
| P31943  | HNRNPH1 | Heterogeneous nuclear ribonucleoprotein H (hnRNP H) [Cleaved into: Heterogeneous nuclear ribonucleoprotein H, N-terminally processed]                                                                                                                                             | 0.12  | 7.88E-01 | Not Sig. | 0.26  | 4.47E-01 | Not Sig. |
| P02538  | KRT6A   | Keratin, type II cytoskeletal 6A (Cytokeratin-6A) (CK-6A) (Cytokeratin-6D) (CK-6D) (Keratin-6A) (K6A) (Type-II keratin Kb6) (allergen Hom s 5)                                                                                                                                    | -0.33 | 8.43E-01 | Not Sig. | -1.14 | 3.49E-01 | Not Sig. |
| P30086  | PEBP1   | Phosphatidylethanolamine-binding protein 1 (PEBP-1) (HCNPPP) (Neuropolypeptide h3) (Prostatic-binding protein) (Raf kinase inhibitor protein) (RKIP) [Cleaved into: Hippocampal cholinergic neurostimulating peptide (HCNP)]                                                      | 0.86  | 7.14E-03 | Not Sig. | 0.54  | 1.17E-01 | Not Sig. |
| Q86Y23  | HRNR    | Homerin                                                                                                                                                                                                                                                                           | 0.56  | 5.03E-01 | Not Sig. | -0.18 | 8.53E-01 | Not Sig. |
| Q6KB66  | KRT80   | Keratin, type II cytoskeletal 80 (Cytokeratin-80) (CK-80) (Keratin-80) (K80) (Type-II keratin Kb20)                                                                                                                                                                               | 0.61  | 4.66E-01 | Not Sig. | -0.30 | 7.33E-01 | Not Sig. |
| P49023  | PXN     | Paxillin                                                                                                                                                                                                                                                                          | -0.64 | 3.32E-01 | Not Sig. | -0.57 | 3.92E-01 | Not Sig. |
| Q96IF1  | AJUBA   | LIM domain-containing protein ajuba                                                                                                                                                                                                                                               | -0.49 | 4.89E-01 | Not Sig. | 0.08  | 9.39E-01 | Not Sig. |
| P22695  | UQCRC2  | Cytochrome b-c1 complex subunit 2, mitochondrial (Complex III subunit 2) (Core protein II) (Ubiquinol-cytochrome-c reductase complex core protein 2)                                                                                                                              | 0.60  | 5.88E-02 | Not Sig. | -0.10 | 8.23E-01 | Not Sig. |
| Q15517  | CDSN    | Corneodesmosin (S protein)                                                                                                                                                                                                                                                        | 1.10  | 4.89E-01 | Not Sig. | -1.08 | 4.83E-01 | Not Sig. |
| P46782  | RP55    | 40S ribosomal protein S5 (Small ribosomal subunit protein uS7) [Cleaved into:                                                                                                                                                                                                     | -0.54 | 6.54E-01 | Not Sig. | -0.26 | 8.23E-01 | Not Sig. |

|        |         |                                                                                                                                                                                                                          |       |          |          |       |          |          |
|--------|---------|--------------------------------------------------------------------------------------------------------------------------------------------------------------------------------------------------------------------------|-------|----------|----------|-------|----------|----------|
|        |         | 40S ribosomal protein S5, N-terminally processed]                                                                                                                                                                        |       |          |          |       |          |          |
| P43490 | NAMPT   | Nicotinamide phosphoribosyltransferase (NAMPTase) (Nampt) (EC 2.4.2.12) (Pre-B-cell colony-enhancing factor 1) (Pre-B cell-enhancing factor) (Visfatin)                                                                  | -0.39 | 6.53E-01 | Not Sig. | -0.43 | 5.49E-01 | Not Sig. |
| O43175 | PHGDH   | D-3-phosphoglycerate dehydrogenase (3-PGDH) (EC 1.1.1.95) (2-oxoglutarate reductase) (EC 1.1.1.399) (Malate dehydrogenase) (EC 1.1.1.37)                                                                                 | -0.50 | 4.77E-01 | Not Sig. | -0.48 | 4.83E-01 | Not Sig. |
| P31151 | S100A7  | Protein S100-A7 (Psoriasin) (S100 calcium-binding protein A7)                                                                                                                                                            | -0.03 | 9.90E-01 | Not Sig. | 0.15  | 9.48E-01 | Not Sig. |
| P62191 | PSMC1   | 26S proteasome regulatory subunit 4 (P264) (26S proteasome AAA-ATPase subunit RPT2) (Proteasome 26S subunit ATPase 1)                                                                                                    | -0.57 | 5.30E-01 | Not Sig. | 0.22  | 8.23E-01 | Not Sig. |
| P14625 | HSP90B1 | Endoplasmic 94 kDa glucose-regulated protein (GRP-94) (Heat shock protein 90 kDa beta member 1) (Tumor rejection antigen 1) (gp96 homolog)                                                                               | 0.01  | 9.90E-01 | Not Sig. | 0.59  | 2.82E-01 | Not Sig. |
| Q08554 | DSC1    | Desmocollin-1 (Cadherin family member 1) (Desmosomal glycoprotein 2/3) (DG2/DG3)                                                                                                                                         | 1.01  | 3.89E-01 | Not Sig. | -0.30 | 8.26E-01 | Not Sig. |
| P62244 | RPS15A  | 40S ribosomal protein S15a (Small ribosomal subunit protein uS8)                                                                                                                                                         | -0.04 | 9.52E-01 | Not Sig. | 0.15  | 7.13E-01 | Not Sig. |
| P36542 | ATP5F1C | ATP synthase subunit gamma, mitochondrial (ATP synthase F1 subunit gamma) (F-ATPase gamma subunit)                                                                                                                       | -0.26 | 7.89E-01 | Not Sig. | -0.25 | 7.84E-01 | Not Sig. |
| P30050 | RPL12   | 60S ribosomal protein L12 (Large ribosomal subunit protein uL11)                                                                                                                                                         | 0.04  | 9.60E-01 | Not Sig. | 0.23  | 6.54E-01 | Not Sig. |
| P02730 | SLC4A1  | Band 3 anion transport protein (Anion exchange protein 1) (AE 1) (Anion exchanger 1) (Solute carrier family 4 member 1) (CD antigen CD233)                                                                               | -0.67 | 6.91E-01 | Not Sig. | 1.04  | 4.43E-01 | Not Sig. |
| P31930 | UQCRC1  | Cytochrome b-c1 complex subunit 1, mitochondrial (Complex III subunit 1) (Core protein I) (Ubiquinol-cytochrome-c reductase complex core protein 1)                                                                      | 0.24  | 7.59E-01 | Not Sig. | -0.02 | 9.84E-01 | Not Sig. |
| Q9Y305 | ACOT9   | Acyl-coenzyme A thioesterase 9, mitochondrial (Acyl-CoA thioesterase 9) (EC 3.1.2.-) (Acyl-CoA thioester hydrolase 9)                                                                                                    | -0.56 | 5.56E-01 | Not Sig. | -0.04 | 9.84E-01 | Not Sig. |
| P39019 | RPS19   | 40S ribosomal protein S19 (Small ribosomal subunit protein eS19)                                                                                                                                                         | 0.59  | 3.71E-01 | Not Sig. | 0.32  | 6.58E-01 | Not Sig. |
| P08708 | RPS17   | 40S ribosomal protein S17 (Small ribosomal subunit protein eS17)                                                                                                                                                         | -0.35 | 7.09E-01 | Not Sig. | -0.22 | 8.17E-01 | Not Sig. |
| P33993 | MCM7    | DNA replication licensing factor MCM7 (EC 3.6.4.12) (CDC47 homolog) (P1.1-MCM3)                                                                                                                                          | 0.17  | 7.19E-01 | Not Sig. | -0.15 | 7.33E-01 | Not Sig. |
| P29692 | EEF1D   | Elongation factor 1-delta (EF-1-delta) (Antigen NY-CO-4)                                                                                                                                                                 | -0.14 | 9.13E-01 | Not Sig. | 0.89  | 1.76E-01 | Not Sig. |
| P60174 | TP11    | Triosephosphate isomerase (TIM) (EC 5.3.1.1) (Methylglyoxal synthase) (EC 4.2.3.3) (Triosephosphate isomerase)                                                                                                           | 0.21  | 7.45E-01 | Not Sig. | 0.73  | 9.75E-02 | Not Sig. |
| P62913 | RPL11   | 60S ribosomal protein L11 (CLL-associated antigen KW-12) (Large ribosomal subunit protein uL5)                                                                                                                           | 0.04  | 9.52E-01 | Not Sig. | 0.15  | 6.77E-01 | Not Sig. |
| P49959 | MRE11   | Double-strand break repair protein MRE11 (EC 3.1.-.-) (Double-strand break repair protein MRE11A) (Meiotic recombination 11 homolog 1) (MRE11 homolog 1) (Meiotic recombination 11 homolog A) (MRE11 homolog A)          | -0.68 | 2.83E-01 | Not Sig. | 0.11  | 9.06E-01 | Not Sig. |
| Q14669 | TRIP12  | E3 ubiquitin-protein ligase TRIP12 (EC 2.3.2.26) (E3 ubiquitin-protein ligase for Arf) (ULF) (HECT-type E3 ubiquitin transferase TRIP12) (Thyroid receptor-interacting protein 12) (TR-interacting protein 12) (TRIP-12) | -0.21 | 8.11E-01 | Not Sig. | -0.09 | 9.32E-01 | Not Sig. |
| P36578 | RPL4    | 60S ribosomal protein L4 (60S ribosomal protein L1) (Large ribosomal subunit protein uL4)                                                                                                                                | 0.09  | 8.63E-01 | Not Sig. | 0.20  | 6.36E-01 | Not Sig. |
| P61513 | RPL37A  | 60S ribosomal protein L37a (Large ribosomal subunit protein eL43)                                                                                                                                                        | 0.48  | 6.31E-01 | Not Sig. | 1.15  | 9.63E-02 | Not Sig. |

|        |          |                                                                                                                                                                                                                           |       |          |          |       |          |          |
|--------|----------|---------------------------------------------------------------------------------------------------------------------------------------------------------------------------------------------------------------------------|-------|----------|----------|-------|----------|----------|
| O15371 | EIF3D    | Eukaryotic translation initiation factor 3 subunit D (eIF3d) (Eukaryotic translation initiation factor 3 subunit 7) (eIF-3-zeta) (eIF3 p66)                                                                               | -0.06 | 9.60E-01 | Not Sig. | -0.25 | 7.59E-01 | Not Sig. |
| P62241 | RPS8     | 40S ribosomal protein S8 (Small ribosomal subunit protein eS8)                                                                                                                                                            | 0.00  | 9.94E-01 | Not Sig. | 0.50  | 4.01E-01 | Not Sig. |
| P68402 | PAFAH1B2 | Platelet-activating factor acetylhydrolase IB subunit alpha2 (EC 3.1.1.47) (PAF acetylhydrolase 30 kDa subunit) (PAF-AH 30 kDa subunit) (PAF-AH subunit beta) (PAFAH subunit beta)                                        | -0.11 | 9.30E-01 | Not Sig. | 0.03  | 9.84E-01 | Not Sig. |
| Q9UQE7 | SMC3     | Structural maintenance of chromosomes protein 3 (SMC protein 3) (SMC-3) (Basement membrane-associated chondroitin proteoglycan) (Bamacan) (Chondroitin sulfate proteoglycan 6) (Chromosome-associated polypeptide) (hCAP) | -0.69 | 3.54E-01 | Not Sig. | -0.09 | 9.37E-01 | Not Sig. |
| P84098 | RPL19    | 60S ribosomal protein L19 (Large ribosomal subunit protein eL19)                                                                                                                                                          | 0.40  | 9.49E-02 | Not Sig. | 0.42  | 8.89E-02 | Not Sig. |
| Q8IX29 | FBXO16   | F-box only protein 16                                                                                                                                                                                                     | -0.69 | 6.89E-01 | Not Sig. | -0.08 | 9.83E-01 | Not Sig. |
| P05198 | EIF2S1   | Eukaryotic translation initiation factor 2 subunit 1 (Eukaryotic translation initiation factor 2 subunit alpha) (eIF-2-alpha) (eIF-2A) (eIF-2alpha)                                                                       | -0.94 | 2.72E-01 | Not Sig. | 0.07  | 9.71E-01 | Not Sig. |
| Q9Y6W3 | CAPN7    | Calpain-7 (EC 3.4.22.-) (PaIB homolog) (PaIBH)                                                                                                                                                                            | -0.72 | 3.78E-01 | Not Sig. | 0.09  | 9.48E-01 | Not Sig. |
| P22629 |          | Streptavidin                                                                                                                                                                                                              | -0.13 | 7.45E-01 | Not Sig. | -0.08 | 8.23E-01 | Not Sig. |
| P01040 | CSTA     | Cystatin-A (Cystatin-AS) (Stefin-A) [Cleaved into: Cystatin-A, N-terminally processed]                                                                                                                                    | -0.03 | 9.90E-01 | Not Sig. | -0.45 | 7.86E-01 | Not Sig. |
| P33992 | MCM5     | DNA replication licensing factor MCM5 (EC 3.6.4.12) (CDC46 homolog) (P1-CDC46)                                                                                                                                            | 0.18  | 7.83E-01 | Not Sig. | -0.40 | 4.32E-01 | Not Sig. |
| Q86T89 | PATL1    | Protein PAT1 homolog 1 (PAT1-like protein 1) (Protein PAT1 homolog b) (Pat1b) (hPat1b)                                                                                                                                    | 0.04  | 9.60E-01 | Not Sig. | 0.00  | 9.96E-01 | Not Sig. |
| O75663 | TIPRL    | TIP41-like protein (Putative MAPK-activating protein PM10) (Type 2A-interacting protein) (TIP)                                                                                                                            | -0.80 | 8.56E-02 | Not Sig. | -0.44 | 4.32E-01 | Not Sig. |
| P59190 | RAB15    | Ras-related protein Rab-15                                                                                                                                                                                                | -0.65 | 3.89E-01 | Not Sig. | 0.14  | 8.85E-01 | Not Sig. |
| Q9UHB6 | LIMA1    | LIM domain and actin-binding protein 1 (Epithelial protein lost in neoplasm)                                                                                                                                              | 0.18  | 8.35E-01 | Not Sig. | 0.53  | 4.10E-01 | Not Sig. |
| P62829 | RPL23    | 60S ribosomal protein L23 (60S ribosomal protein L17) (Large ribosomal subunit protein uL14)                                                                                                                              | 0.01  | 9.90E-01 | Not Sig. | -0.17 | 7.11E-01 | Not Sig. |
| O75131 | CPNE3    | Copine-3 (Copine III)                                                                                                                                                                                                     | 0.16  | 8.11E-01 | Not Sig. | 0.04  | 9.71E-01 | Not Sig. |
| P04844 | RPN2     | Dolichyl-diphosphooligosaccharide-protein glycosyltransferase subunit 2 (Dolichyl-diphosphooligosaccharide-protein glycosyltransferase 63 kDa subunit) (RIBIIR) (Ribophorin II) (RPN-II) (Ribophorin-2)                   | 0.03  | 9.52E-01 | Not Sig. | 0.21  | 4.94E-01 | Not Sig. |
| Q9H6Z4 | RANBP3   | Ran-binding protein 3 (RanBP3)                                                                                                                                                                                            | 0.09  | 9.52E-01 | Not Sig. | 0.53  | 5.37E-01 | Not Sig. |
| P48444 | ARCN1    | Coatomer subunit delta (Archain) (Delta-coat protein) (Delta-COP)                                                                                                                                                         | -0.30 | 6.92E-01 | Not Sig. | 0.16  | 8.23E-01 | Not Sig. |
| P49588 | AARS1    | Alanine--tRNA ligase, cytoplasmic (EC 6.1.1.7) (Alanyl-tRNA synthetase) (AlaRS) (Renal carcinoma antigen NY-REN-42)                                                                                                       | -0.26 | 7.16E-01 | Not Sig. | -0.02 | 9.84E-01 | Not Sig. |
| P26639 | TARS1    | Threonine--tRNA ligase 1, cytoplasmic (EC 6.1.1.3) (Threonyl-tRNA synthetase) (ThrRS) (Threonyl-tRNA synthetase 1)                                                                                                        | 0.17  | 7.63E-01 | Not Sig. | 0.34  | 4.32E-01 | Not Sig. |
| Q9UHD1 | CHORDC1  | Cysteine and histidine-rich domain-containing protein 1 (CHORD domain-containing protein 1) (CHORD-containing protein 1) (CHP-1) (Protein morgana)                                                                        | -0.19 | 7.88E-01 | Not Sig. | -0.45 | 4.04E-01 | Not Sig. |
| Q562R1 | ACTBL2   | Beta-actin-like protein 2 (Kappa-actin)                                                                                                                                                                                   | -0.25 | 7.09E-01 | Not Sig. | 0.14  | 8.23E-01 | Not Sig. |
| Q8IWZ3 | ANKHD1   | Ankyrin repeat and KH domain-containing protein 1 (HIV-1 Vpr-binding ankyrin repeat protein) (Multiple ankyrin repeats single KH domain) (hMASK)                                                                          | -0.39 | 7.05E-01 | Not Sig. | 0.09  | 9.48E-01 | Not Sig. |
| P06753 | TPM3     | Tropomyosin alpha-3 chain (Gamma-tropomyosin) (Tropomyosin-3) (Tropomyosin-5) (hTMS5)                                                                                                                                     | -0.41 | 7.09E-01 | Not Sig. | -0.28 | 7.96E-01 | Not Sig. |

|        |          |                                                                                                                                                                                                                                                             |       |          |          |       |          |          |
|--------|----------|-------------------------------------------------------------------------------------------------------------------------------------------------------------------------------------------------------------------------------------------------------------|-------|----------|----------|-------|----------|----------|
| P16403 | H1-2     | Histone H1.2 (Histone H1c) (Histone H1d) (Histone H1s-1)                                                                                                                                                                                                    | -0.07 | 9.72E-01 | Not Sig. | 1.03  | 2.77E-01 | Not Sig. |
| P46779 | RPL28    | 60S ribosomal protein L28 (Large ribosomal subunit protein eL28)                                                                                                                                                                                            | -0.46 | 2.53E-01 | Not Sig. | -0.95 | 7.60E-03 | Not Sig. |
| P23490 | LORICRIN | Loricrin                                                                                                                                                                                                                                                    | 0.35  | 8.63E-01 | Not Sig. | -0.72 | 6.77E-01 | Not Sig. |
| P62888 | RPL30    | 60S ribosomal protein L30 (Large ribosomal subunit protein eL30)                                                                                                                                                                                            | -0.18 | 7.63E-01 | Not Sig. | 0.02  | 9.84E-01 | Not Sig. |
| Q14974 | KPNB1    | Importin subunit beta-1 (Importin-90) (Karyopherin subunit beta-1) (Nuclear factor p97) (Pore targeting complex 97 kDa subunit) (PTAC97)                                                                                                                    | 0.05  | 9.73E-01 | Not Sig. | 0.48  | 5.49E-01 | Not Sig. |
| Q723Y8 | KRT27    | Keratin, type I cytoskeletal 27 (Cytokeratin-27) (CK-27) (Keratin-25C) (K25C) (Keratin-27) (K27) (Type I inner root sheath-specific keratin-K25irs3)                                                                                                        | 0.08  | 9.59E-01 | Not Sig. | 0.75  | 3.93E-01 | Not Sig. |
| P05161 | ISG15    | Ubiquitin-like protein ISG15 (Interferon-induced 15 kDa protein) (Interferon-induced 17 kDa protein) (IP17) (Ubiquitin cross-reactive protein) (hUCRP)                                                                                                      | 0.17  | 9.03E-01 | Not Sig. | -0.40 | 7.11E-01 | Not Sig. |
| O75223 | GGCT     | Gamma-glutamylcyclotransferase (EC 4.3.2.9) (Cytochrome c-releasing factor 21)                                                                                                                                                                              | 0.87  | 4.25E-01 | Not Sig. | -0.76 | 4.83E-01 | Not Sig. |
| P29401 | TKT      | Transketolase (TK) (EC 2.2.1.1)                                                                                                                                                                                                                             | -0.24 | 7.88E-01 | Not Sig. | 0.43  | 5.37E-01 | Not Sig. |
| Q96B21 | TMEM45B  | Transmembrane protein 45B                                                                                                                                                                                                                                   | -0.56 | 6.89E-01 | Not Sig. | 0.01  | 9.96E-01 | Not Sig. |
| Q9NSD9 | FAR5B    | Phenylalanine-tRNA ligase beta subunit (EC 6.1.1.20) (Phenylalanyl-tRNA synthetase beta subunit) (PheRS)                                                                                                                                                    | 0.43  | 6.67E-01 | Not Sig. | 0.04  | 9.84E-01 | Not Sig. |
| P31040 | SDHA     | Succinate dehydrogenase [ubiquinone] flavoprotein subunit, mitochondrial (EC 1.3.5.1) (Flavoprotein subunit of complex II) (Fp)                                                                                                                             | 0.04  | 9.72E-01 | Not Sig. | 0.11  | 8.55E-01 | Not Sig. |
| P61088 | UBE2N    | Ubiquitin-conjugating enzyme E2 N (EC 2.3.2.23) (Bendless-like ubiquitin-conjugating enzyme) (E2 ubiquitin-conjugating enzyme N) (Ubc13) (UbcH13) (Ubiquitin carrier protein N) (Ubiquitin-protein ligase N)                                                | 0.59  | 5.93E-01 | Not Sig. | 0.30  | 7.92E-01 | Not Sig. |
| Q00610 | CLTC     | Clathrin heavy chain 1 (Clathrin heavy chain on chromosome 17) (CLH-17)                                                                                                                                                                                     | -0.39 | 4.77E-01 | Not Sig. | 0.12  | 8.36E-01 | Not Sig. |
| P60866 | RPS20    | 40S ribosomal protein S20 (Small ribosomal subunit protein uS10)                                                                                                                                                                                            | 0.36  | 3.85E-01 | Not Sig. | -0.21 | 6.43E-01 | Not Sig. |
| P25205 | MCM3     | DNA replication licensing factor MCM3 (EC 3.6.4.12) (DNA polymerase alpha holoenzyme-associated protein P1) (P1-MCM3) (RLF subunit beta) (p102)                                                                                                             | 0.52  | 6.26E-02 | Not Sig. | -0.24 | 4.88E-01 | Not Sig. |
| P21266 | GSTM3    | Glutathione S-transferase Mu 3 (EC 2.5.1.18) (GST class-mu 3) (GSTM3-3) (hGSTM3-3)                                                                                                                                                                          | -0.09 | 9.37E-01 | Not Sig. | 0.10  | 9.14E-01 | Not Sig. |
| P14174 | MIF      | Macrophage migration inhibitory factor (MIF) (EC 5.3.2.1) (Glycosylation-inhibiting factor) (GIF) (L-dopachrome isomerase) (L-dopachrome tautomerase) (EC 5.3.3.12) (Phenylpyruvate tautomerase)                                                            | 0.20  | 5.81E-01 | Not Sig. | 0.41  | 1.32E-01 | Not Sig. |
| Q5T4S7 | UBR4     | E3 ubiquitin-protein ligase UBR4 (EC 2.3.2.27) (600 kDa retinoblastoma protein-associated factor) (N-recognin-4) (RING-type E3 ubiquitin transferase UBR4) (Retinoblastoma-associated factor of 600 kDa) (RBAF600) (p600) (Zinc finger UBR1-type protein 1) | 0.20  | 7.63E-01 | Not Sig. | 0.04  | 9.71E-01 | Not Sig. |
| Q9NZ01 | TECR     | Very-long-chain enoyl-CoA reductase (EC 1.3.1.93) (Synaptic glycoprotein SC2) (Trans-2,3-enoyl-CoA reductase) (TER)                                                                                                                                         | 0.24  | 7.88E-01 | Not Sig. | 0.65  | 3.36E-01 | Not Sig. |
| P52292 | KPNA2    | Importin subunit alpha-1 (Karyopherin subunit alpha-2) (RAG cohort protein 1) (SRP1-alpha)                                                                                                                                                                  | 0.50  | 4.77E-01 | Not Sig. | 0.43  | 5.17E-01 | Not Sig. |
| O75533 | SF3B1    | Splicing factor 3B subunit 1 (Pre-mRNA-splicing factor SF3b 155 kDa subunit) (SF3b155) (Spliceosome-associated protein 155) (SAP 155)                                                                                                                       | -0.49 | 6.31E-01 | Not Sig. | -1.22 | 8.89E-02 | Not Sig. |
| O75352 | MPDU1    | Mannose-P-dolichol utilization defect 1 protein (Suppressor of Lec15 and Lec35 glycosylation mutation homolog) (SL15)                                                                                                                                       | -0.36 | 6.38E-01 | Not Sig. | -0.37 | 5.75E-01 | Not Sig. |

|        |          |                                                                                                                                                                                                                                                                                                                           |       |          |          |       |          |          |
|--------|----------|---------------------------------------------------------------------------------------------------------------------------------------------------------------------------------------------------------------------------------------------------------------------------------------------------------------------------|-------|----------|----------|-------|----------|----------|
| Q15323 | KRT31    | Keratin, type I cuticular Ha1 (Hair keratin, type I Ha1) (Keratin-31) (K31)                                                                                                                                                                                                                                               | -0.08 | 9.89E-01 | Not Sig. | 1.30  | 5.49E-01 | Not Sig. |
| Q16543 | CDC37    | Hsp90 co-chaperone Cdc37 (Hsp90 chaperone protein kinase-targeting subunit) (p50Cdc37) [Cleaved into: Hsp90 co-chaperone Cdc37, N-terminally processed]                                                                                                                                                                   | -0.08 | 8.74E-01 | Not Sig. | -0.19 | 6.29E-01 | Not Sig. |
| Q8N9Q2 | SREK1IP1 | Protein SREK1IP1 (SFRS12-interacting protein 1) (SREK1-interacting protein 1) (Splicing regulatory protein of 18 kDa) (p18SRP)                                                                                                                                                                                            | -0.29 | 8.11E-01 | Not Sig. | 0.60  | 5.37E-01 | Not Sig. |
| P63092 | NA       | Guanine nucleotide-binding protein G(s) subunit alpha isoforms short (Adenylate cyclase-stimulating G alpha protein)                                                                                                                                                                                                      | 0.29  | 7.77E-01 | Not Sig. | -0.31 | 7.33E-01 | Not Sig. |
| Q13596 | SNX1     | Sorting nexin-1                                                                                                                                                                                                                                                                                                           | 0.09  | 9.30E-01 | Not Sig. | -0.50 | 4.06E-01 | Not Sig. |
| P50454 | SERPINH1 | Serpin H1 (47 kDa heat shock protein) (Arsenic-transactivated protein 3) (AsTP3) (Cell proliferation-inducing gene 14 protein) (Collagen-binding protein) (Colligin) (Rheumatoid arthritis-related antigen RA-A47)                                                                                                        | 0.01  | 9.94E-01 | Not Sig. | -0.69 | 4.94E-01 | Not Sig. |
| Q14697 | GANAB    | Neutral alpha-glucosidase AB (EC 3.2.1.207) (Alpha-glucosidase 2) (Glucosidase II subunit alpha)                                                                                                                                                                                                                          | 0.13  | 8.66E-01 | Not Sig. | 0.37  | 5.37E-01 | Not Sig. |
| Q8WVV4 | POF1B    | Protein POF1B (Premature ovarian failure protein 1B)                                                                                                                                                                                                                                                                      | 0.25  | 8.11E-01 | Not Sig. | -0.05 | 9.83E-01 | Not Sig. |
| Q96AG4 | LRRCS9   | Leucine-rich repeat-containing protein 59 (Ribosome-binding protein p34) (p34) [Cleaved into: Leucine-rich repeat-containing protein 59, N-terminally processed]                                                                                                                                                          | -0.01 | 9.94E-01 | Not Sig. | 0.17  | 8.06E-01 | Not Sig. |
| Q15365 | PCBP1    | Poly(rC)-binding protein 1 (Alpha-CP1) (Heterogeneous nuclear ribonucleoprotein E1) (hnRNP E1) (Nucleic acid-binding protein SUB2.3)                                                                                                                                                                                      | -0.61 | 3.71E-01 | Not Sig. | -0.46 | 4.94E-01 | Not Sig. |
| P46776 | RPL27A   | 60S ribosomal protein L27a (Large ribosomal subunit protein uL15)                                                                                                                                                                                                                                                         | 0.05  | 8.64E-01 | Not Sig. | -0.03 | 9.40E-01 | Not Sig. |
| Q16881 | TXNRD1   | Thioredoxin reductase 1, cytoplasmic (TR) (EC 1.8.1.9) (Gene associated with retinoic and interferon-induced mortality 12 protein) (GRIM-12) (Gene associated with retinoic and IFN-induced mortality 12 protein) (KM-102-derived reductase-like factor) (Thioredoxin reductase TR1)                                      | -0.38 | 5.57E-01 | Not Sig. | -0.28 | 6.58E-01 | Not Sig. |
| Q9Y4E8 | USP15    | Ubiquitin carboxyl-terminal hydrolase 15 (EC 3.4.19.12) (Deubiquitinating enzyme 15) (Ubiquitin-specific-processing protease 15) (Unph-2) (Unph4)                                                                                                                                                                         | -1.08 | 5.01E-02 | Not Sig. | -1.12 | 5.12E-02 | Not Sig. |
| Q13263 | TRIM28   | Transcription intermediary factor 1-beta (TIF1-beta) (E3 SUMO-protein ligase TRIM28) (EC 2.3.2.27) (KRAB-associated protein 1) (KAP-1) (KRAB-interacting protein 1) (KRIP-1) (Nuclear corepressor KAP-1) (RING finger protein 96) (RING-type E3 ubiquitin transferase TIF1-beta) (Tripartite motif-containing protein 28) | -0.13 | 8.63E-01 | Not Sig. | -0.26 | 6.77E-01 | Not Sig. |
| Q14980 | XPO1     | Exportin-1 (Exp1) (Chromosome region maintenance 1 protein homologue)                                                                                                                                                                                                                                                     | 0.19  | 8.20E-01 | Not Sig. | -0.50 | 4.51E-01 | Not Sig. |
| Q9H910 | JPT2     | Jupiter microtubule associated homolog 2 (Hematological and neurological expressed 1-like protein) (HN1-like protein)                                                                                                                                                                                                     | -0.23 | 7.64E-01 | Not Sig. | -0.70 | 1.72E-01 | Not Sig. |
| P09493 | TPM1     | Tropomyosin alpha-1 chain (Alpha-tropomyosin) (Tropomyosin-1)                                                                                                                                                                                                                                                             | -0.30 | 6.89E-01 | Not Sig. | 0.02  | 9.84E-01 | Not Sig. |
| P69905 | HBA1     | Hemoglobin subunit alpha (Alpha-globin) (Hemoglobin alpha chain)                                                                                                                                                                                                                                                          | 0.29  | 7.63E-01 | Not Sig. | 0.35  | 6.79E-01 | Not Sig. |
| P63220 | RPS21    | 40S ribosomal protein S21 (Small ribosomal subunit protein eS21)                                                                                                                                                                                                                                                          | -0.08 | 9.52E-01 | Not Sig. | -0.45 | 5.17E-01 | Not Sig. |
| Q9UQ80 | PA2G4    | Proliferation-associated protein 2G4 (Cell cycle protein p38-2G4 homologue) (hG4-1) (ErbB3-binding protein 1)                                                                                                                                                                                                             | 0.15  | 7.66E-01 | Not Sig. | 0.67  | 5.85E-02 | Not Sig. |

|        |         |                                                                                                                                                                                                                                                       |       |          |          |       |          |          |
|--------|---------|-------------------------------------------------------------------------------------------------------------------------------------------------------------------------------------------------------------------------------------------------------|-------|----------|----------|-------|----------|----------|
| Q92945 | KHSRP   | Far upstream element-binding protein 2 (FUSE-binding protein 2) (KH type-splicing regulatory protein) (KSRP) (p75)                                                                                                                                    | 0.42  | 5.57E-01 | Not Sig. | 0.16  | 8.32E-01 | Not Sig. |
| Q9ULV4 | CORO1C  | Coronin-1C (Coronin-3) (hCRNN4)                                                                                                                                                                                                                       | -0.06 | 9.60E-01 | Not Sig. | -0.21 | 7.86E-01 | Not Sig. |
| P55036 | PSMD4   | 26S proteasome non-ATPase regulatory subunit 4 (26S proteasome regulatory subunit RPN10) (26S proteasome regulatory subunit SSA) (Antisecretory factor 1) (AF) (ASF) (Multiubiquitin chain-binding protein)                                           | -0.81 | 7.14E-03 | Not Sig. | -0.52 | 1.14E-01 | Not Sig. |
| P49790 | NUP153  | Nuclear pore complex protein Nup153 (153 kDa nucleoporin) (Nucleoporin Nup153)                                                                                                                                                                        | 0.32  | 5.08E-01 | Not Sig. | -0.27 | 5.49E-01 | Not Sig. |
| Q9NZT1 | CALML5  | Calmodulin-like protein 5 (Calmodulin-like skin protein)                                                                                                                                                                                              | -0.68 | 4.77E-01 | Not Sig. | -0.39 | 6.99E-01 | Not Sig. |
| Q13428 | TCOF1   | Treacle protein (Treacher Collins syndrome protein)                                                                                                                                                                                                   | 0.28  | 6.86E-01 | Not Sig. | 0.84  | 6.95E-02 | Not Sig. |
| Q9Y678 | COPG1   | Coatamer subunit gamma-1 (Gamma-1-coat protein) (Gamma-1-COP)                                                                                                                                                                                         | -0.17 | 8.11E-01 | Not Sig. | 0.19  | 7.84E-01 | Not Sig. |
| P61313 | RPL15   | 60S ribosomal protein L15 (Large ribosomal subunit protein eL15)                                                                                                                                                                                      | -0.26 | 6.31E-01 | Not Sig. | 0.21  | 6.79E-01 | Not Sig. |
| Q14818 | PSMA7   | Proteasome subunit alpha type-7 (Proteasome subunit RC6-1) (Proteasome subunit XAPC7)                                                                                                                                                                 | -0.35 | 7.09E-01 | Not Sig. | 0.25  | 7.84E-01 | Not Sig. |
| P42167 | NA      | Lamina-associated polypeptide 2, isoforms beta/gamma (Thymopoietin, isoforms beta/gamma) (TP beta/gamma) (Thymopoietin-related peptide isoforms beta/gamma) (TPRP isoforms beta/gamma) [Cleaved into: Thymopoietin (TP) (Splenin); Thymopentin (TP5)] | -0.09 | 9.30E-01 | Not Sig. | 0.43  | 5.17E-01 | Not Sig. |
| P42766 | RPL35   | 60S ribosomal protein L35 (Large ribosomal subunit protein uL29)                                                                                                                                                                                      | 0.27  | 5.81E-01 | Not Sig. | 0.36  | 4.06E-01 | Not Sig. |
| P07339 | CTSD    | Cathepsin D (EC 3.4.23.5) [Cleaved into: Cathepsin D light chain; Cathepsin D heavy chain]                                                                                                                                                            | 0.42  | 7.84E-01 | Not Sig. | -0.66 | 5.96E-01 | Not Sig. |
| O00571 | DDX3X   | ATP-dependent RNA helicase DDX3X (EC 3.6.4.13) (CAP-Rf) (DEAD box protein 3, X-chromosomal) (DEAD box, X isoform) (DBX) (Helicase-like protein 2) (HLP2)                                                                                              | -0.34 | 5.70E-01 | Not Sig. | -0.13 | 8.32E-01 | Not Sig. |
| Q9P035 | HACD3   | Very-long-chain (3R)-3-hydroxyacyl-CoA dehydratase 3 (EC 4.2.1.134) (3-hydroxyacyl-CoA dehydratase 3) (HACD3) (Butyrate-induced protein 1) (B-ind1) (hB-ind1) (Protein-tyrosine phosphatase-like A domain-containing protein 1)                       | 0.37  | 7.05E-01 | Not Sig. | 0.32  | 7.15E-01 | Not Sig. |
| P09651 | HNRNPA1 | Heterogeneous nuclear ribonucleoprotein A1 (hnRNP A1) (Helix-destabilizing protein) (Single-strand RNA-binding protein) (hnRNP core protein A1) [Cleaved into: Heterogeneous nuclear ribonucleoprotein A1, N-terminally processed]                    | -0.22 | 7.63E-01 | Not Sig. | 0.36  | 5.35E-01 | Not Sig. |
| Q9HCY8 | S100A14 | Protein S100-A14 (S100 calcium-binding protein A14) (S114)                                                                                                                                                                                            | -0.48 | 7.09E-01 | Not Sig. | -0.83 | 4.26E-01 | Not Sig. |
| P26196 | DDX6    | Probable ATP-dependent RNA helicase DDX6 (EC 3.6.4.13) (ATP-dependent RNA helicase p54) (DEAD box protein 6) (Oncogene RCK)                                                                                                                           | -0.27 | 7.64E-01 | Not Sig. | 0.29  | 7.31E-01 | Not Sig. |
| O95969 | SCGB1D2 | Secretoglobin family 1D member 2 (Lipophilin-B)                                                                                                                                                                                                       | -0.05 | 9.86E-01 | Not Sig. | -0.27 | 8.23E-01 | Not Sig. |
| P29218 | IMPA1   | Inositol monophosphatase 1 (IMP 1) (IMPase 1) (EC 3.1.3.25) (D-galactose 1-phosphate phosphatase) (EC 3.1.3.94) (Inositol-1(or 4)-monophosphatase 1) (Lithium-sensitive myo-inositol monophosphatase A1)                                              | -0.14 | 9.14E-01 | Not Sig. | -0.11 | 9.27E-01 | Not Sig. |
| Q96CW1 | AP2M1   | AP-2 complex subunit mu (AP-2 mu chain) (Adaptin-mu2) (Adaptor protein complex AP-2 subunit mu) (Adaptor-related protein complex 2 subunit mu) (Clathrin assembly protein                                                                             | -0.41 | 5.47E-01 | Not Sig. | 0.02  | 9.84E-01 | Not Sig. |

|        |          |                                                                                                                                                                                                               |       |          |          |       |          |          |
|--------|----------|---------------------------------------------------------------------------------------------------------------------------------------------------------------------------------------------------------------|-------|----------|----------|-------|----------|----------|
|        |          | complex 2 mu medium chain) (Clathrin coat assembly protein AP50) (Clathrin coat-associated protein AP50) (HA2 50 kDa subunit) (Plasma membrane adaptor AP-2 50 kDa protein)                                   |       |          |          |       |          |          |
| Q8TDY2 | RB1CC1   | RB1-inducible coiled-coil protein 1 (FAK family kinase-interacting protein of 200 kDa) (FIP200)                                                                                                               | -0.59 | 4.54E-01 | Not Sig. | 0.00  | 9.99E-01 | Not Sig. |
| Q9UNF1 | MAGED2   | Melanoma-associated antigen D2 (1186) (Breast cancer-associated gene 1 protein) (BCCG-1) (Hepatocellular carcinoma-associated protein JCL-1) (MAGE-D2 antigen)                                                | -0.14 | 9.09E-01 | Not Sig. | -0.52 | 5.06E-01 | Not Sig. |
| Q8TF72 | SHROOM3  | Protein Shroom3 (Shroom-related protein) (hShrml)                                                                                                                                                             | -0.43 | 7.63E-01 | Not Sig. | -0.20 | 8.93E-01 | Not Sig. |
| P61626 | LYZ      | Lysozyme C (EC 3.2.1.17) (1,4-beta-N-acetylmuramidase C)                                                                                                                                                      | -0.49 | 8.11E-01 | Not Sig. | -0.61 | 7.49E-01 | Not Sig. |
| Q8N823 | ZNF611   | Zinc finger protein 611                                                                                                                                                                                       | -0.48 | 6.91E-01 | Not Sig. | -0.04 | 9.84E-01 | Not Sig. |
| P63104 | YWHAZ    | 14-3-3 protein zeta/delta (Protein kinase C inhibitor protein 1) (KCIP-1)                                                                                                                                     | -0.31 | 8.06E-01 | Not Sig. | 0.76  | 4.31E-01 | Not Sig. |
| P48047 | ATP5PO   | ATP synthase subunit O, mitochondrial (ATP synthase peripheral stalk subunit OSCP) (Oligomycin sensitivity conferral protein) (OSCP)                                                                          | -0.20 | 8.28E-01 | Not Sig. | 0.35  | 6.63E-01 | Not Sig. |
| P15170 | GSPT1    | Eukaryotic peptide chain release factor GTP-binding subunit ERF3A (Eukaryotic peptide chain release factor subunit 3a) (eRF3a) (G1 to S phase transition protein 1 homolog)                                   | -0.25 | 7.77E-01 | Not Sig. | -0.34 | 6.63E-01 | Not Sig. |
| O60664 | PLIN3    | Perilipin-3 (47 kDa mannose 6-phosphate receptor-binding protein) (47 kDa MPR-binding protein) (Cargo selection protein TIP47) (Mannose-6-phosphate receptor-binding protein 1) (Placental protein 17) (PP17) | -0.42 | 4.57E-01 | Not Sig. | -0.69 | 1.15E-01 | Not Sig. |
| A6NHQ2 | FBLL1    | rRNA/tRNA 2'-O-methyltransferase fibrillar-like protein 1 (EC 2.1.1.-) (Protein-glutamine methyltransferase)                                                                                                  | -0.60 | 3.71E-01 | Not Sig. | 0.14  | 8.57E-01 | Not Sig. |
| O94979 | SEC31A   | Protein transport protein Sec31A (ABP125) (ABP130) (SEC31-like protein 1) (SEC31-related protein A) (Web1-like protein)                                                                                       | -0.33 | 7.63E-01 | Not Sig. | 0.35  | 7.31E-01 | Not Sig. |
| Q9H3U1 | UNC45A   | Protein unc-45 homolog A (Unc-45A) (GCUNC-45) (Smooth muscle cell-associated protein 1) (SMAP-1)                                                                                                              | -0.68 | 2.97E-01 | Not Sig. | -0.56 | 3.95E-01 | Not Sig. |
| Q6ZVX7 | NCCRP1   | F-box only protein 50 (NCC receptor protein 1 homolog) (NCCRP-1) (Non-specific cytotoxic cell receptor protein 1 homolog)                                                                                     | 0.84  | 3.15E-01 | Not Sig. | -0.66 | 4.35E-01 | Not Sig. |
| O43684 | BUB3     | Mitotic checkpoint protein BUB3                                                                                                                                                                               | 0.28  | 6.83E-01 | Not Sig. | 0.01  | 9.86E-01 | Not Sig. |
| Q13838 | DDX39B   | Spliceosome RNA helicase DDX39B (EC 3.6.4.13) (56 kDa U2AF65-associated protein) (ATP-dependent RNA helicase p47) (DEAD box protein UAP56) (HLA-B-associated transcript 1 protein)                            | -0.11 | 8.84E-01 | Not Sig. | 0.05  | 9.66E-01 | Not Sig. |
| Q05639 | EEF1A2   | Elongation factor 1-alpha 2 (EF-1-alpha-2) (Eukaryotic elongation factor 1 A-2) (eEF1A-2) (Statin-51)                                                                                                         | -0.01 | 9.89E-01 | Not Sig. | 0.09  | 8.55E-01 | Not Sig. |
| O14979 | HNRNPD L | Heterogeneous nuclear ribonucleoprotein D-like (hnRNP D-like) (hnRNP DL) (AU-rich element RNA-binding factor) (JKT41-binding protein) (Protein laAUF1)                                                        | 0.39  | 5.30E-01 | Not Sig. | -0.39 | 4.94E-01 | Not Sig. |
| P46977 | STT3A    | Dolichyl-diphosphooligosaccharide-protein glycosyltransferase subunit STT3A (Oligosaccharyl transferase subunit STT3A) (STT3-A) (EC 2.4.99.18) (B5) (Integral membrane protein 1) (Transmembrane protein TMC) | -0.44 | 4.77E-01 | Not Sig. | -0.17 | 8.14E-01 | Not Sig. |
| O60884 | DNAJA2   | DnaJ homolog subfamily A member 2 (Cell cycle progression restoration gene 3 protein) (Dnj3) (Dj3) (HIRA-interacting protein 4) (Renal carcinoma antigen NY-REN-14)                                           | -0.63 | 4.54E-01 | Not Sig. | -1.09 | 9.23E-02 | Not Sig. |



|        |          |                                                                                                                                                                                                                                            |       |          |          |       |          |          |
|--------|----------|--------------------------------------------------------------------------------------------------------------------------------------------------------------------------------------------------------------------------------------------|-------|----------|----------|-------|----------|----------|
| Q9Y496 | KIF3A    | Kinesin-like protein KIF3A (Microtubule plus end-directed kinesin motor 3A)                                                                                                                                                                | -0.51 | 6.65E-01 | Not Sig. | -0.15 | 9.10E-01 | Not Sig. |
| P49591 | SARS1    | Serine-tRNA ligase, cytoplasmic (EC 6.1.1.11) (Seryl-tRNA synthetase) (SerRS) (Seryl-tRNA(Ser/Sec) synthetase)                                                                                                                             | -0.41 | 5.70E-01 | Not Sig. | 0.60  | 3.06E-01 | Not Sig. |
| P19623 | SRM      | Spermidine synthase (SPDSV) (EC 2.5.1.16) (Putrescine aminopropyltransferase)                                                                                                                                                              | 0.70  | 1.69E-01 | Not Sig. | 0.00  | 9.96E-01 | Not Sig. |
| P05090 | APOD     | Apolipoprotein D (Apo-D) (ApoD)                                                                                                                                                                                                            | -0.41 | 7.34E-01 | Not Sig. | -0.10 | 9.53E-01 | Not Sig. |
| P13489 | RNH1     | Ribonuclease inhibitor (Placental ribonuclease inhibitor) (Placental RNase inhibitor) (Ribonuclease/angiogenin inhibitor 1) (RAI)                                                                                                          | -0.19 | 8.11E-01 | Not Sig. | 0.41  | 5.37E-01 | Not Sig. |
| Q99497 | PARK7    | Parkinson disease protein 7 (Maillard deglycase) (Oncogene DJ1) (Parkinsonism-associated deglycase) (Protein DJ-1) (DJ-1) (Protein/nucleic acid deglycase DJ-1) (EC 3.1.2.-) (EC 3.5.1.-) (EC 3.5.1.124)                                   | -0.25 | 7.09E-01 | Not Sig. | 0.01  | 9.84E-01 | Not Sig. |
| E9PRG8 | C11orf98 | Uncharacterized protein C11orf98                                                                                                                                                                                                           | -0.58 | 4.93E-01 | Not Sig. | 1.14  | 8.89E-02 | Not Sig. |
| Q9UHD8 | SEPTIN9  | Septin-9 (MLL septin-like fusion protein MSF-A) (MLL septin-like fusion protein) (Ovarian/Breast septin) (Ov/Br septin) (Septin D1)                                                                                                        | -0.02 | 9.90E-01 | Not Sig. | -0.30 | 7.34E-01 | Not Sig. |
| P53618 | COPB1    | Coatomer subunit beta (Beta-coat protein) (Beta-COP)                                                                                                                                                                                       | -0.50 | 4.77E-01 | Not Sig. | 0.42  | 5.35E-01 | Not Sig. |
| P63173 | RPL38    | 60S ribosomal protein L38 (Large ribosomal subunit protein eL38)                                                                                                                                                                           | 0.04  | 9.72E-01 | Not Sig. | 0.59  | 1.95E-01 | Not Sig. |
| P78347 | GTF2I    | General transcription factor II-I (GTFII-I) (TFII-I) (Bruton tyrosine kinase-associated protein 135) (BAP-135) (BTK-associated protein 135) (SRF-Phox1-interacting protein) (SPIN) (Williams-Beuren syndrome chromosomal region 6 protein) | 0.63  | 4.38E-03 | Not Sig. | -0.42 | 8.25E-02 | Not Sig. |
