# Supplementary material for: Caspase-2 protects against ferroptotic cell death
Source: PubMed Central journal article supplement (PMC10907636; doi:10.1038/s41419-024-06560-6), 2024-03-01
Supplement: 41419_2024_6560_MOESM8_ESM.pdf [file 41419_2024_6560_MOESM8_ESM.pdf]

## Supplementary table 2

The acquisition scheme for diaPASEF

| MS Type | Cycle Id | Start IM [1/K0] | End IM [1/K0] | Start Mass [m/z] | End Mass [m/z] | CE [e V] |
|---------|----------|-----------------|---------------|------------------|----------------|----------|
| MS1     | 0        | -               | -             | -                | -              | -        |
| PASEF   | 1        | 0.9001          | 1.2001        | 800.00           | 826.00         | -        |
| PASEF   | 1        | 0.6000          | 0.9001        | 400.00           | 426.00         | -        |
| PASEF   | 2        | 0.9201          | 1.2201        | 825.00           | 851.00         | -        |
| PASEF   | 2        | 0.6200          | 0.9201        | 425.00           | 451.00         | -        |
| PASEF   | 3        | 0.9301          | 1.2301        | 850.00           | 876.00         | -        |
| PASEF   | 3        | 0.6300          | 0.9301        | 450.00           | 476.00         | -        |
| PASEF   | 4        | 0.9500          | 1.2501        | 875.00           | 901.00         | -        |
| PASEF   | 4        | 0.6501          | 0.9500        | 475.00           | 501.00         | -        |
| PASEF   | 5        | 0.9600          | 1.2601        | 900.00           | 926.00         | -        |
| PASEF   | 5        | 0.6601          | 0.9600        | 500.00           | 526.00         | -        |
| PASEF   | 6        | 0.9800          | 1.2801        | 925.00           | 951.00         | -        |
| PASEF   | 6        | 0.6801          | 0.9800        | 525.00           | 551.00         | -        |
| PASEF   | 7        | 0.9900          | 1.2901        | 950.00           | 976.00         | -        |
| PASEF   | 7        | 0.6900          | 0.9900        | 550.00           | 576.00         | -        |
| PASEF   | 8        | 1.0101          | 1.3101        | 975.00           | 1001.00        | -        |
| PASEF   | 8        | 0.7100          | 1.0101        | 575.00           | 601.00         | -        |
| PASEF   | 9        | 1.0201          | 1.3201        | 1000.0<br>0      | 1026.01        | -        |
| PASEF   | 9        | 0.7200          | 1.0201        | 600.00           | 626.00         | -        |
| PASEF   | 10       | 1.0401          | 1.3401        | 1025.0<br>1      | 1051.01        | -        |
| PASEF   | 10       | 0.7400          | 1.0401        | 625.00           | 651.00         | -        |
| PASEF   | 11       | 1.0601          | 1.3601        | 1050.0<br>1      | 1076.01        | -        |
| PASEF   | 11       | 0.7601          | 1.0601        | 650.00           | 676.00         | -        |
| PASEF   | 12       | 1.0701          | 1.3701        | 1075.0<br>1      | 1101.01        | -        |
| PASEF   | 12       | 0.7701          | 1.0701        | 675.00           | 701.00         | -        |
| PASEF   | 13       | 1.0901          | 1.3901        | 1100.0<br>1      | 1126.01        | -        |
| PASEF   | 13       | 0.7901          | 1.0901        | 700.00           | 726.00         | -        |
| PASEF   | 14       | 1.1001          | 1.4001        | 1125.0<br>1      | 1151.01        | -        |
| PASEF   | 14       | 0.8001          | 1.1001        | 725.00           | 751.00         | -        |
| PASEF   | 15       | 1.1201          | 1.4201        | 1150.0<br>1      | 1176.01        | -        |
| PASEF   | 15       | 0.8200          | 1.1201        | 750.00           | 776.00         | -        |
| PASEF   | 16       | 1.1300          | 1.4301        | 1175.0<br>1      | 1201.01        | -        |
| PASEF   | 16       | 0.8300          | 1.1300        | 775.00           | 801.00         | -        |
