# Supplementary material for: Caspase-2 protects against ferroptotic cell death
Source: PubMed Central journal article supplement (PMC10907636; doi:10.1038/s41419-024-06560-6), 2024-03-01

Original western blots

Figure 1a

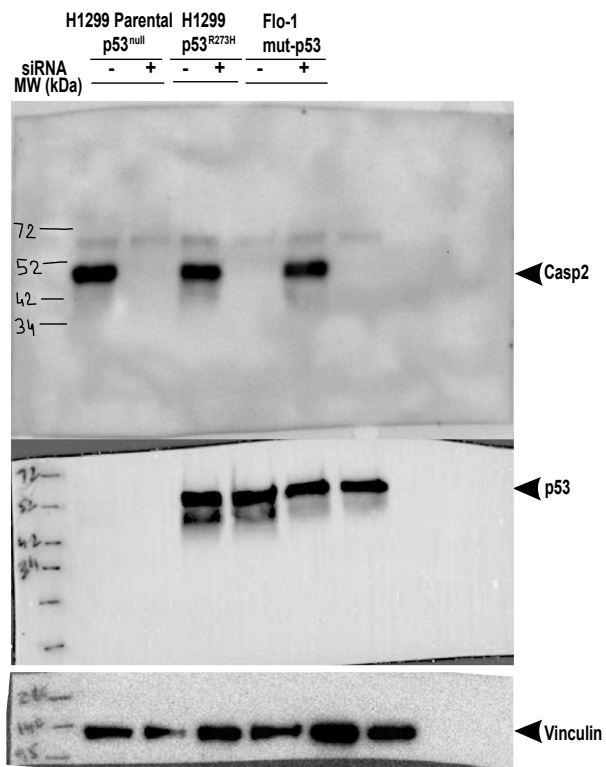

# Figure 2a

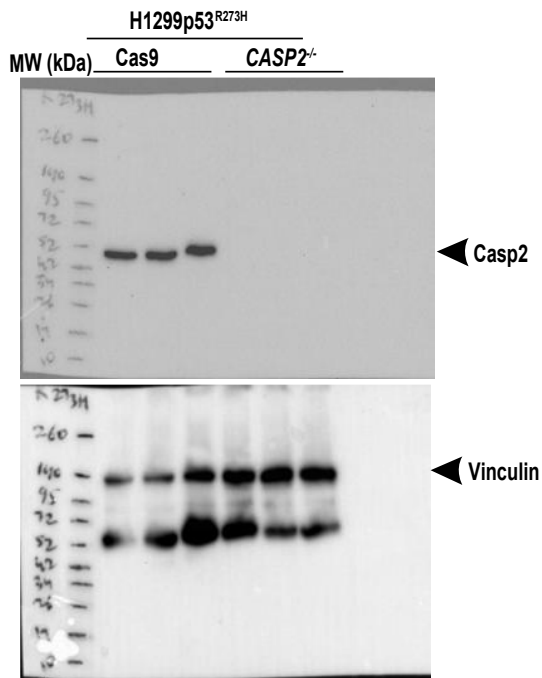

# Figure 4

b)

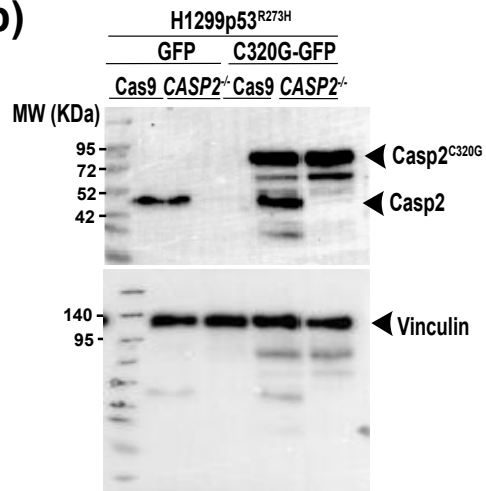

d)

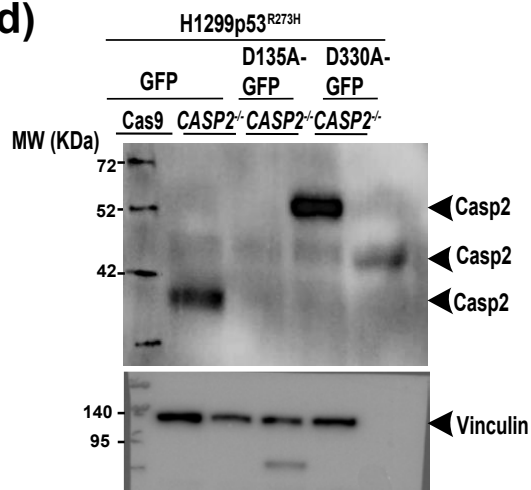

# Figure 6

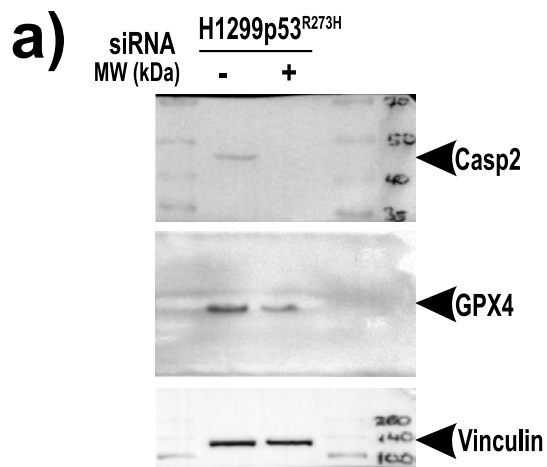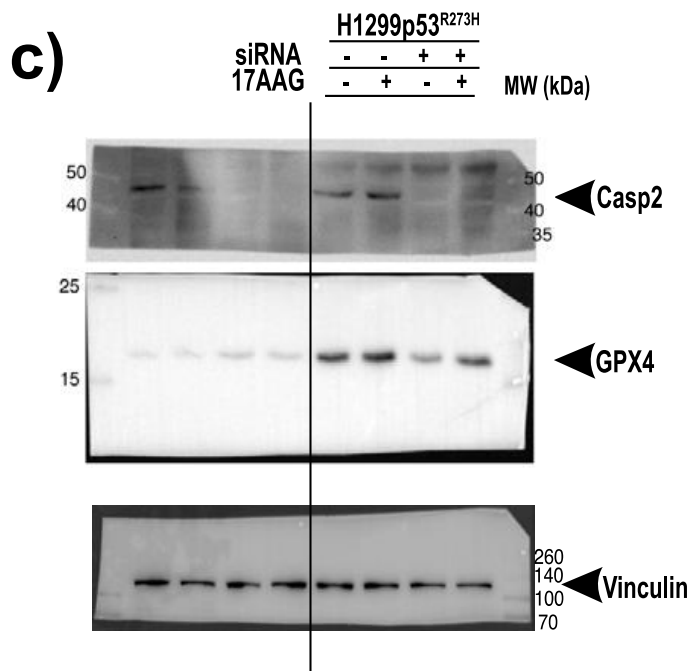

# Supplementary Figure S1

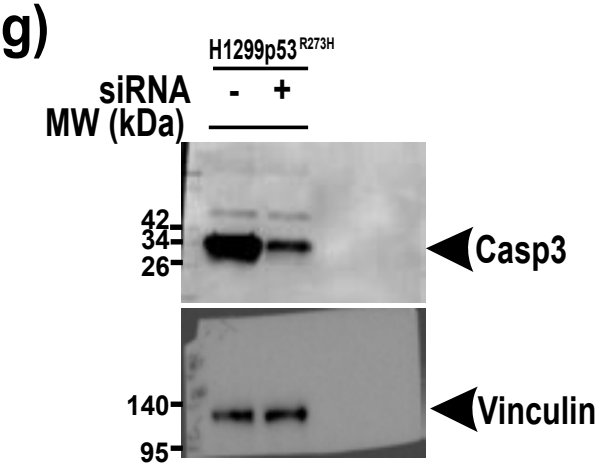

# Supplementary Figure S2

a)

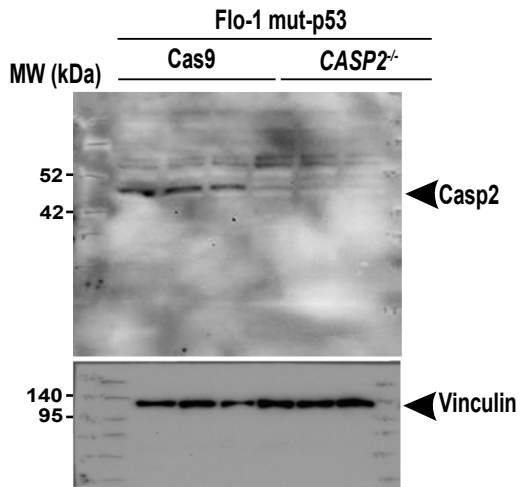

g)

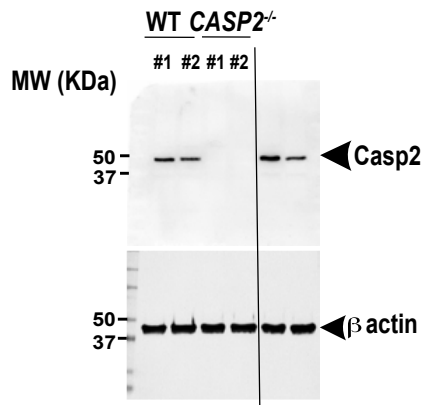

# Supplementary Figure S4

a)

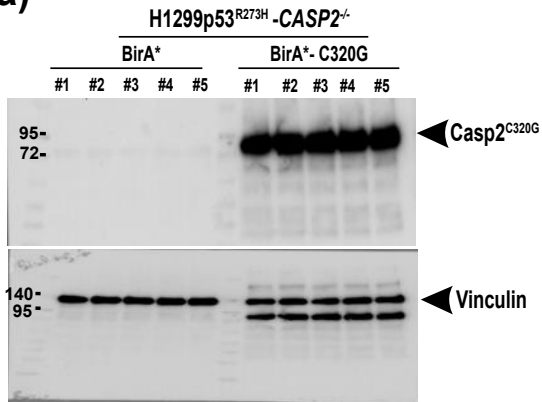

c)

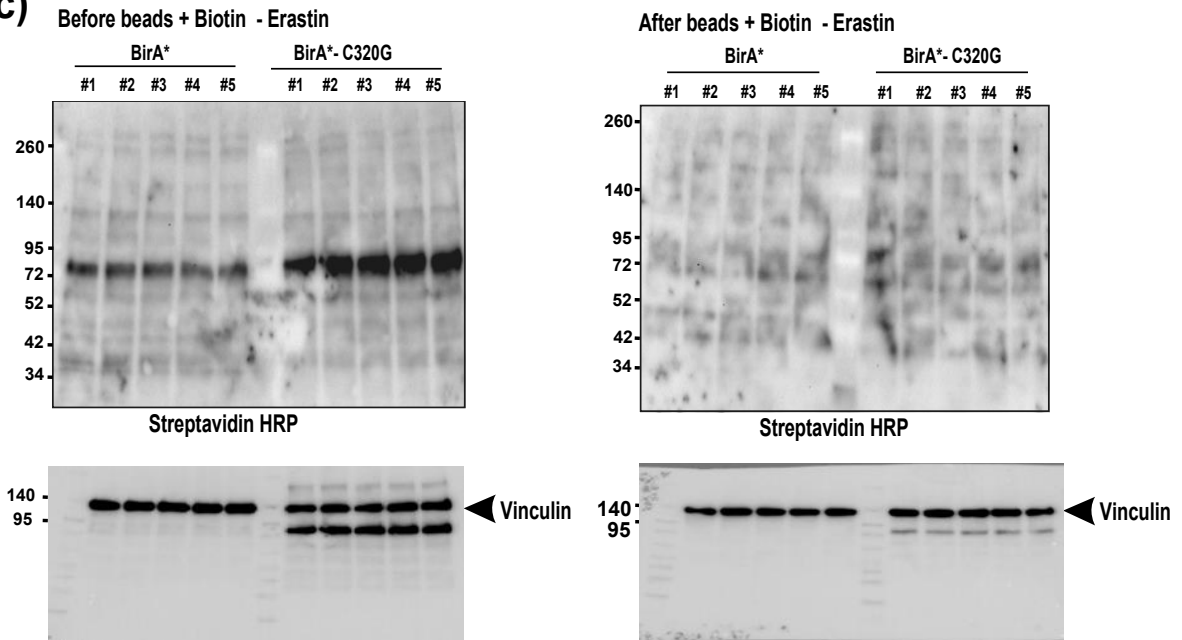

d)

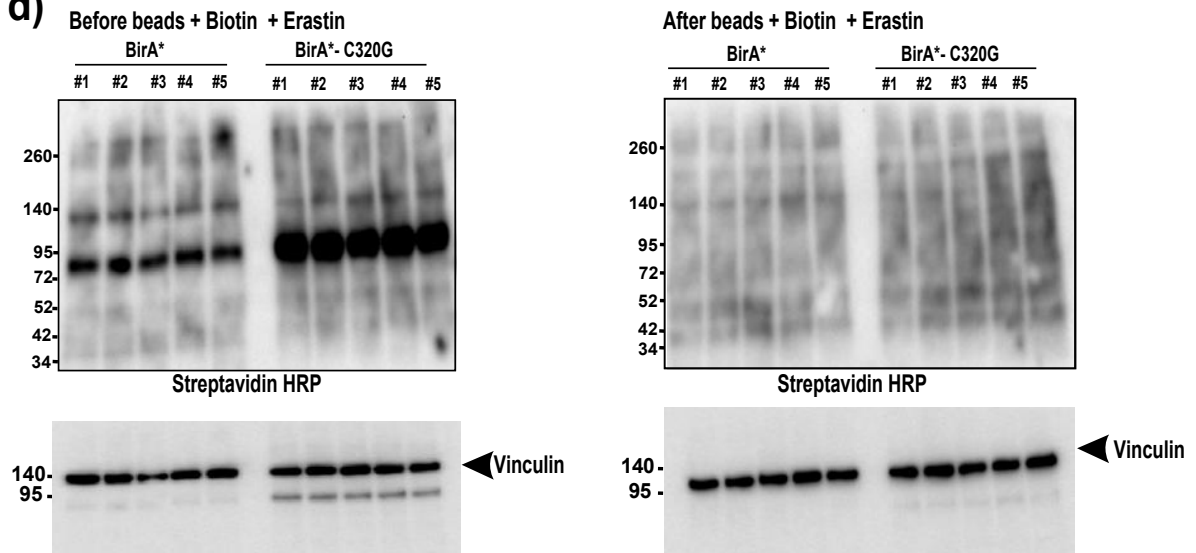

# Supplementary Figure S5

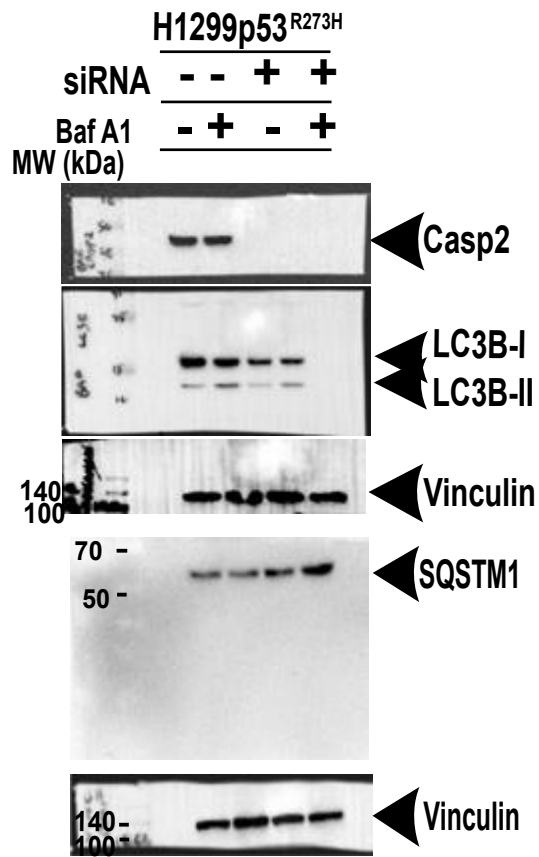

Supplement: 41419_2024_6560_MOESM13_ESM.pdf [file 41419_2024_6560_MOESM13_ESM.pdf]
